# Supplementary material for: Genetic Predisposition to Coronary Artery Disease in Type 2 Diabetes Mellitus
Source: PubMed Central journal article supplement (PMC7748049; doi:10.1161/circgen.119.002769), 2020-08-13
Supplement: hcg-13-e002769-s001.pdf [file hcg-13-e002769-s001.pdf]

## **SUPPLEMENTAL MATERIAL**

### **Supplemental methods**

#### *Discovery*

The discovery meta-analysis contained 24 studies from CARDIoGRAM $\textit{plus}$ C4D, ENGAGE and SUMMIT consortia of European descent, except for PROMIS, which included individuals of South Asian descent for which full summary statistics were available (Supplementary Table 1). Cases were selected for inclusion following the standard criteria for CAD and myocardial infarction used in the CARDIoGRAM $\textit{plus}$ C4D consortium.<sup>1</sup> There was no sample overlap amongst the studies included from different consortia.

The discovery included both cross-sectional studies and longitudinal studies (analysed as cross-sectional studies). We accounted for the contemporaneous diagnoses of T2D and CAD in longitudinal studies by including CAD cases that had a diagnosis of T2D prior and up to 5 years after the CAD event.

To identify loci that were specific to CAD in the context of diabetes, and to identify loci that interacted with T2D to modify the risk of CAD, analyses were stratified by T2D status, which included 24,259 subjects with T2D (10,014 CAD cases) and 42,384 subjects without diabetes (17,694 CAD cases). Studies provided summary statistics for variants typed on the Cardio MetaboChip array or provided GWAS data imputed to either HapMap2 or 1000 Genomes phase 1 reference panels.<sup>2</sup>

#### *Replication*

Replication was sought for loci that achieved a discovery  $p$  value  $< 1 \times 10^{-4}$  for association with CAD in at least one of the following analyses: all individuals combined regardless of T2D status; subjects with T2D only; subjects without diabetes; or the interaction analysis. Replication was conducted in 11,537 subjects with T2D (3,706 CAD cases) and 106,250 subjects without diabetes (12,988 CAD cases) from four studies of European descent (Supplementary Table 2). The samples used in the replication analyses were independent of those used in the discovery analysis.

## Joint analysis and combination of evidence

We had access to full summary statistics for the discovery analysis and requested summary statistics for variants selected for replication from replication cohorts. Thus, we performed a joint analysis between the estimates for individual variants from the discovery analyses and summary statistics for a subset of variants selected for replication. Analyses were performed in each study to test the following comparisons: CAD in subjects with T2D and CAD in subjects without diabetes. Association was tested with CAD status in a regression model, adjusted for age, sex and study specific covariates such as principal components to account for population structure, where applicable. Age was defined as age of event for CAD cases and age at sampling for controls.

Genotype characteristics for the discovery cohort are given in Supplementary Table 3. We excluded variants: minor allele frequency (MAF) $<1\%$ ;  $2 \times N$  cases  $\times$ MAF $<10$ ; Hardy-Weinberg equilibrium test  $p$  value ( $p_{hwe}$ )  $<5 \times 10^{-7}$  and MAF $>5\%$  or  $p_{hwe} < 1 \times 10^{-4}$  and MAF $<5\%$  for directly typed variants and imputation information score  $<0.4$  (IMPUTE2)/imputation information score  $<0.3$  (MaCH) for imputed variants or a call rate  $<95\%$  for directly typed variants.

We used the additive model to generate association summary statistics and combined these statistics in a fixed-effect inverse variance-weighted meta-analysis using GWAMA v2.1.<sup>3</sup> We used a fixed effects model to estimate the allelic effects in individual strata, under the assumptions that any differences in allelic effect between strata were due to type 2 diabetes background. This method did not account for between study variation in allelic effects. To test for heterogeneous allelic effects by T2D status, we used the method outlined by Magi et al., 2010.<sup>3</sup> We double genomic control (GC) corrected association summary statistics both at the study level and in the overall discovery meta-analysis.

Variants were excluded from the discovery meta-analysis if the effective sample size  $< 4000$ .

We estimated the interaction effects based on comparing the summary allelic effect on CAD for each variant between subjects with and without T2D. This approach allowed us to include more samples in the meta-analyses as studies that did not contain both subjects with and without T2D could be

included in the stratified analyses but would have been excluded from a meta-analysis of the interaction term. By adopting this approach, we were able to increase the sample size but were unable to account for between study variance in allelic effects.

### **Signal declaration criteria**

We selected loci for replication based on a  $p$  value of association for the lead variant  $\leq 1 \times 10^{-4}$  in the T2D only, non-diabetic only and interaction analyses. The genotype characteristics of the replication cohorts are given in Supplementary Table 4. We estimated the combined effect sizes for variants in a joint analysis based on a fixed-effect inverse variance-weighted meta-analysis using GWAMA v2.1.<sup>3</sup> Novel loci were declared at  $p \leq 5 \times 10^{-8}$ . For declaring interaction signals, we required that the directions of effect for individual strata were consistent across the discovery and replication analyses and achieved a  $p_{interaction} < 0.05/175$  (the number of variants selected for replication) in the replication analysis. Suggestive interaction signals were identified as those that showed directional consistency across the discovery and replication analyses, and when combined in joint analysis achieved combined  $p_{interaction} < \text{discovery } p_{interaction}$ .

### **Power calculations**

#### ***Stratified and overall analyses***

Power calculations were conducted in R statistics using the gap package.<sup>4</sup> For the purpose of the power calculations effective population size was used ( $4 / (1/N_{cases} + 1/N_{ctrls})$ ) and a disease prevalence of 5%. The calculation also considered allele frequency and effect size. We used an  $\alpha \leq 5 \times 10^{-8}$  for novel loci.

#### ***Interaction analysis***

Statistical interaction was calculated by testing the difference between two estimates of allelic effect on CAD. The allelic effects were estimated in subjects with diabetes and without diabetes separated and were compared using GWAMA v2.1 to calculate a  $p_{interaction}$ .<sup>3</sup> The power to detect an interaction

depends on how accurately the allelic effect can be estimated in each stratum. We assessed the power to detect an interaction effect of a CAD-risk variant with T2D in three allelic effect scenarios: a) an effect on CAD in subjects with T2D only (i.e. OR is 1 in subjects without diabetes, but varies between 1 and 1.2 in subjects with T2D); b) an effect on CAD in subjects with T2D and without diabetes in the same direction but of differing magnitude (i.e. OR is 1.10 in subjects without diabetes, but varies between 1 and 1.2 in subjects with T2D); and c) an effect on CAD in subjects with T2D and without diabetes but in opposite directions (i.e. OR is 0.90 in subjects without diabetes, but varies between 1 and 1.2 in subjects with T2D). For each scenario, we evaluated a range of risk allele frequencies: 10%, 20% and 50%. Power was calculated for  $\alpha \leq 1 \times 10^{-4}$  in discovery (using discovery sample sizes) based on the threshold for replication.

### **Genetic correlation with related risk factors**

We assessed the genetic correlation of CAD by diabetes subgroup with related risk factors using LDHub.<sup>5</sup> Genetic correlation was calculated by taking the slope of the regression of the product of trait 1 z scores on trait 2 z scores on the LD score for a SNP. Z scores were derived from the allelic effects and standard error for that trait. We restricted the analysis to 106 traits available in LDHub that are known risk factors for T2D and CAD.

### **Genetic risk score analysis**

SNPs associated with Waist-Hip-ratio (adjusted for body mass index [BMI]), number of SNPs [ $N_{\text{SNPs}}=53$ ],<sup>6</sup> BMI (untransformed,  $N_{\text{SNPs}}=95$  and z-transformed,  $N_{\text{SNPs}}=23$ ),<sup>7,8</sup> systolic blood pressure (SBP) ( $N_{\text{SNPs}}=21$ ),<sup>9,10</sup> LDL-C ( $N_{\text{SNPs}}=143$ ), HDL-C ( $N_{\text{SNPs}}=143$ ), triglycerides ( $N_{\text{SNPs}}=143$ ),<sup>11</sup> T1D, T2D ( $N_{\text{SNPs}}=403$ ),<sup>12</sup> 2-hr glucose (adjusted for BMI,  $N_{\text{SNPs}}=15$ ),<sup>13</sup> fasting glucose (FG, adjusted for BMI,  $N_{\text{SNPs}}=21$ ),<sup>14</sup> glycosylated haemoglobin ( $N_{\text{SNPs}}=15$ ),<sup>15</sup> fasting insulin (natural log transformed and adjusted for BMI,  $N_{\text{SNPs}}=13$ ),<sup>14</sup> fasting pro-insulin (adjusted for BMI and FG,  $N_{\text{SNPs}}=10$ ),<sup>16</sup> HOMA-B( $N_{\text{SNPs}}=15$ ), HOMA-IR( $N_{\text{SNPs}}=15$ )<sup>17</sup> and insulin resistance ( $N_{\text{SNPs}}=10$ )<sup>18</sup> at genome-wide significance ( $p \leq 5 \times 10^{-8}$ ) were included in a genetic risk score (GRS) for each trait respectively. To account for the pleiotropic effects

amongst the lipid associated loci a multivariable model was employed from in R using the TwoSampleMR package.<sup>19</sup> For all other GRS the inverse variance weighted method was used to associate each of the GRS with CAD summary statistics.<sup>20</sup>

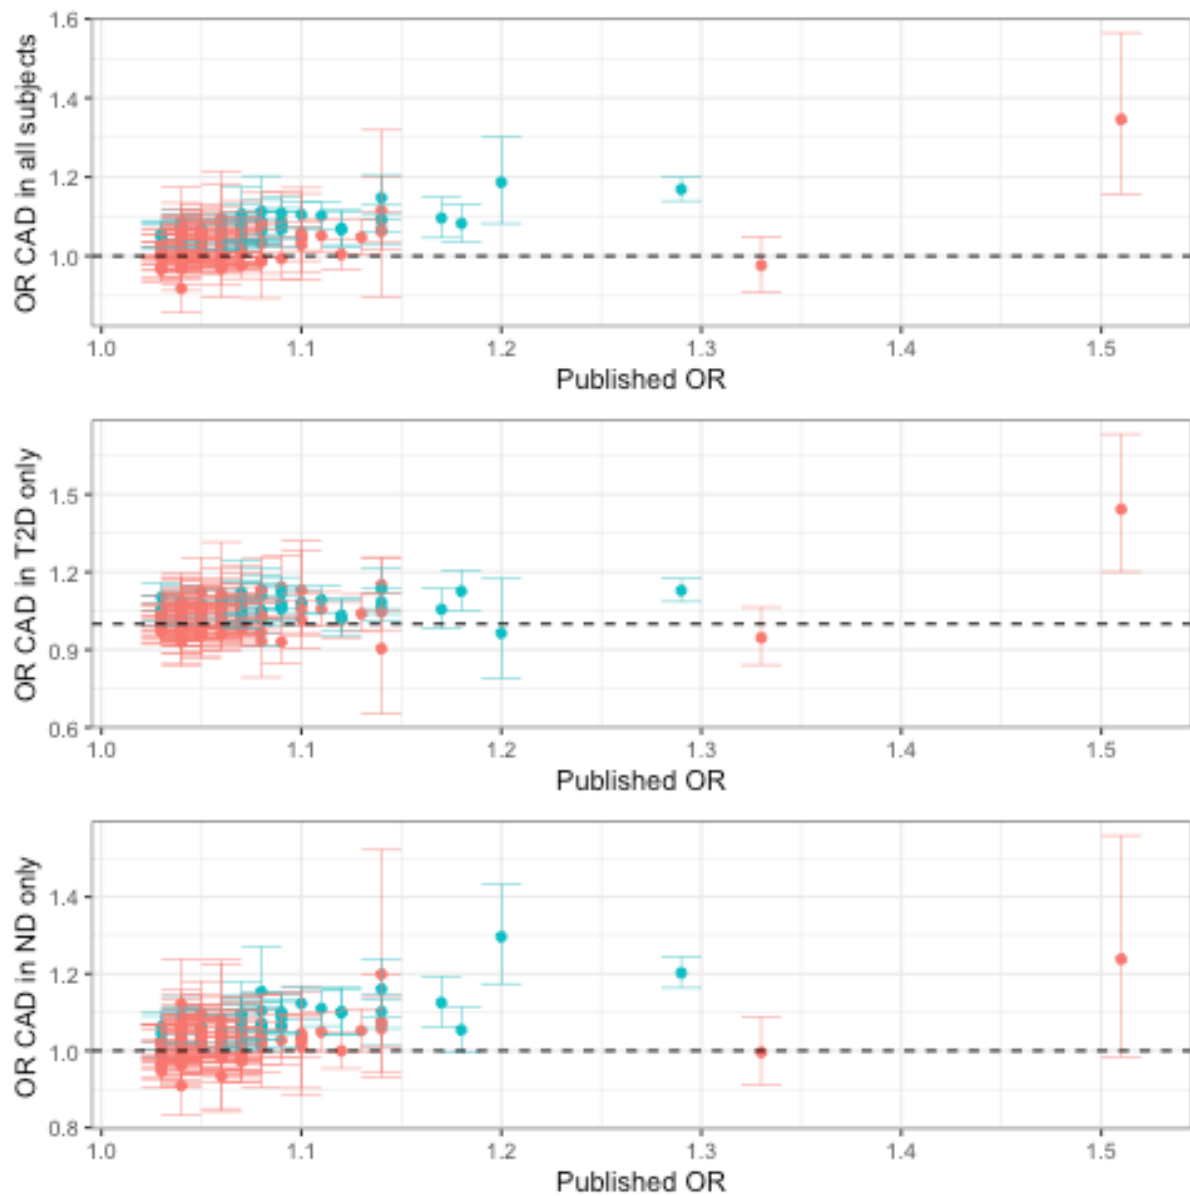

**Supplementary Figure 1:** Odds ratios (OR) for 160 known coronary artery disease (CAD) loci from this study compared to the published OR in the combined analysis of CAD, CAD in subjects with T2D and for CAD in subjects without diabetes. The blue colour indicates a  $p < 5 \times 10^{-3}$  in at least one of the analyses. For these SNPs the odds ratios  $\geq 1.00$  for the published risk allele.

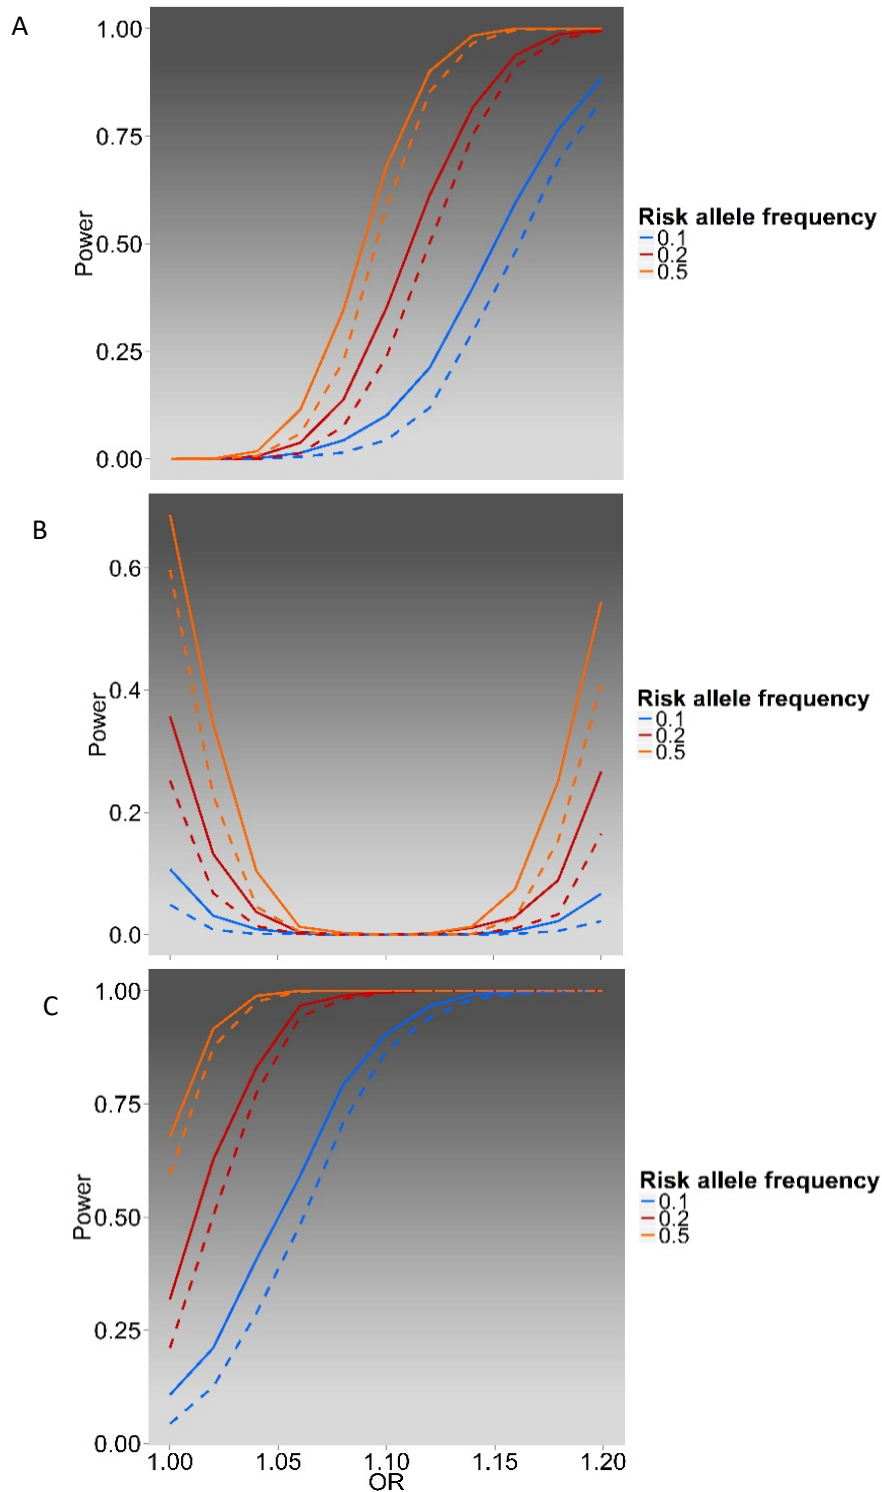

**Supplementary Figure 2:** Interactions can be broadly classified into three classes: A) effect on coronary artery disease (CAD) is specific to subjects with type 2 diabetes (T2D) (i.e. OR is 1.0 in diabetes free subjects, but varies between 1.0 and 1.2 in subjects with T2D); B) effect on CAD is heterogeneous, but is in the same direction irrespective of diabetes status (i.e. OR is 1.10 in diabetes free subjects, but varies between 1.0 and 1.2 in subjects with T2D); and C) effect on CAD is heterogeneous, and is in the opposite direction in subjects with T2D and diabetes free subjects (i.e. OR is 0.9 in diabetes free subjects, but varies between 1.0 and 1.2 in subjects with T2D). The continuous lines represent the power to detect an interaction  $p < 1 \times 10^{-4}$  in discovery and the dashed line a  $p < 0.05$  in the replication.

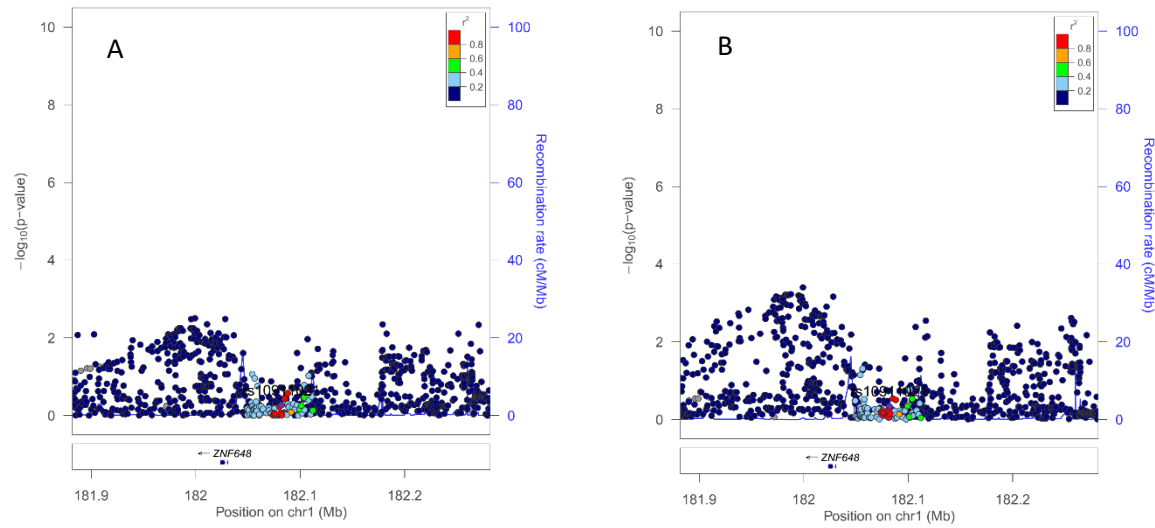

**Supplementary Figure 3:** Locuszoom plots of association statistics in the region of *ZNF648* for a published variant rs10911021 with coronary artery disease (A) and the interaction p value with type 2 diabetes (B). This variant has been previously reported to interact with T2D to modify the risk of coronary artery disease.



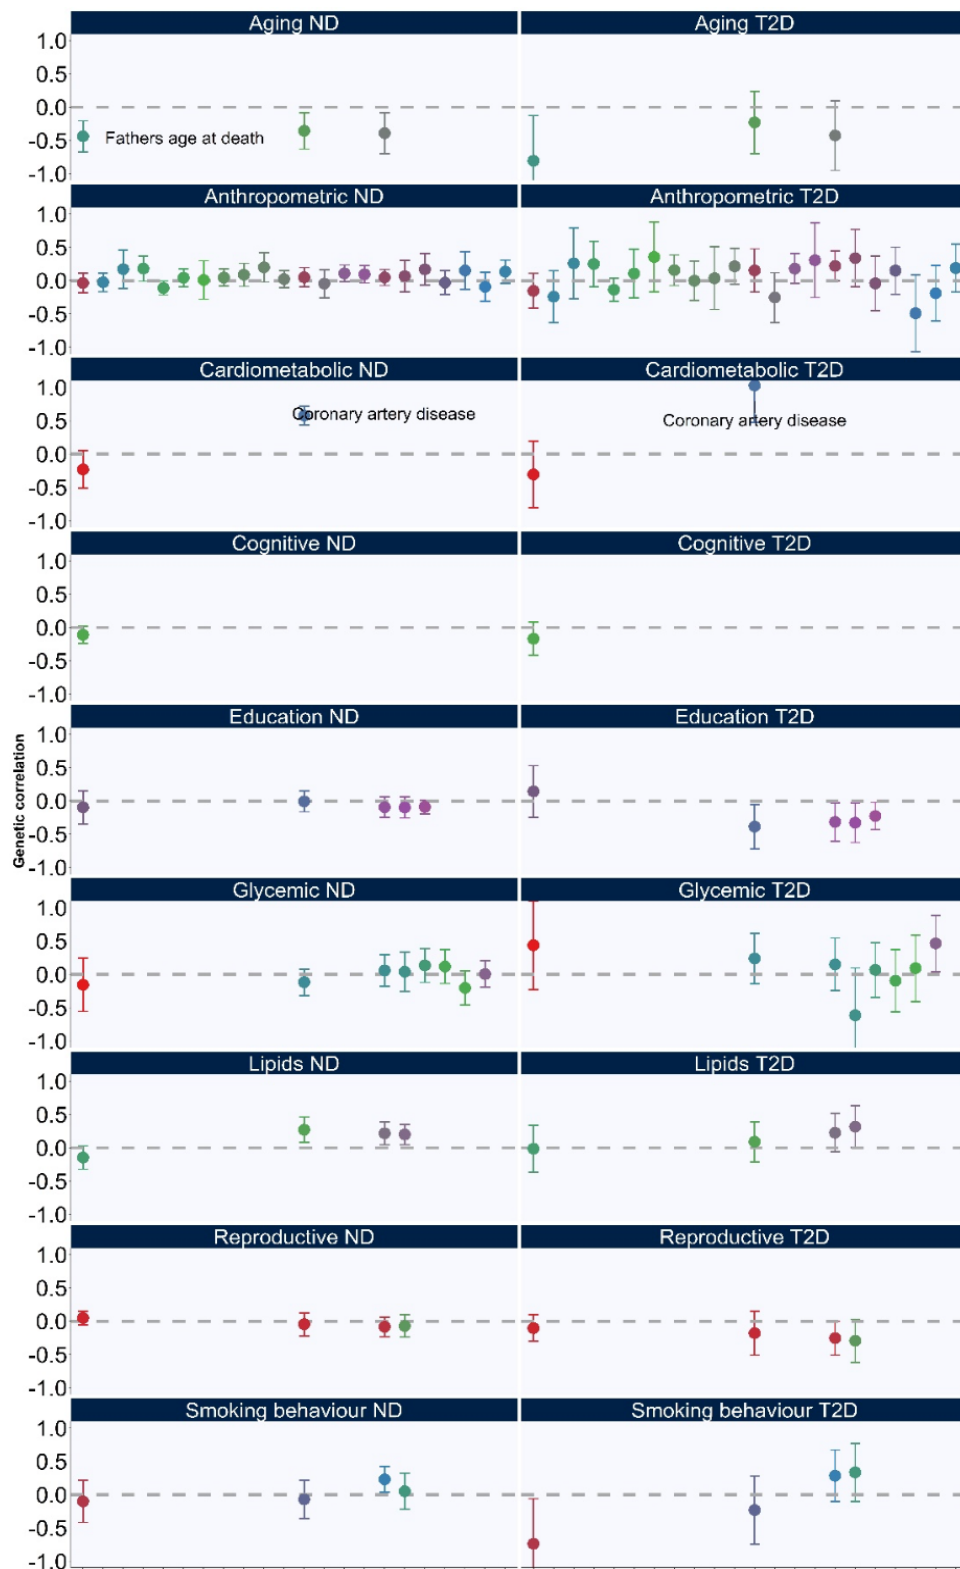

**Supplementary Figure 4:** Genetic correlation of coronary artery disease stratified by type 2 diabetes with known risk factors for CAD. Asterisks indicate a p value <math> < 4.1 \times 10^{-4}</math> (0.05/121) for accuracy in the estimation of genetic correlation. Where the error bars do not cross zero-line <math> p < 0.05</math>. Genetic correlations are calculated from all variants rather than those reaching genome-wide significance and give a broader picture of the overall genetic overlap. A different colour point is assigned to each trait.

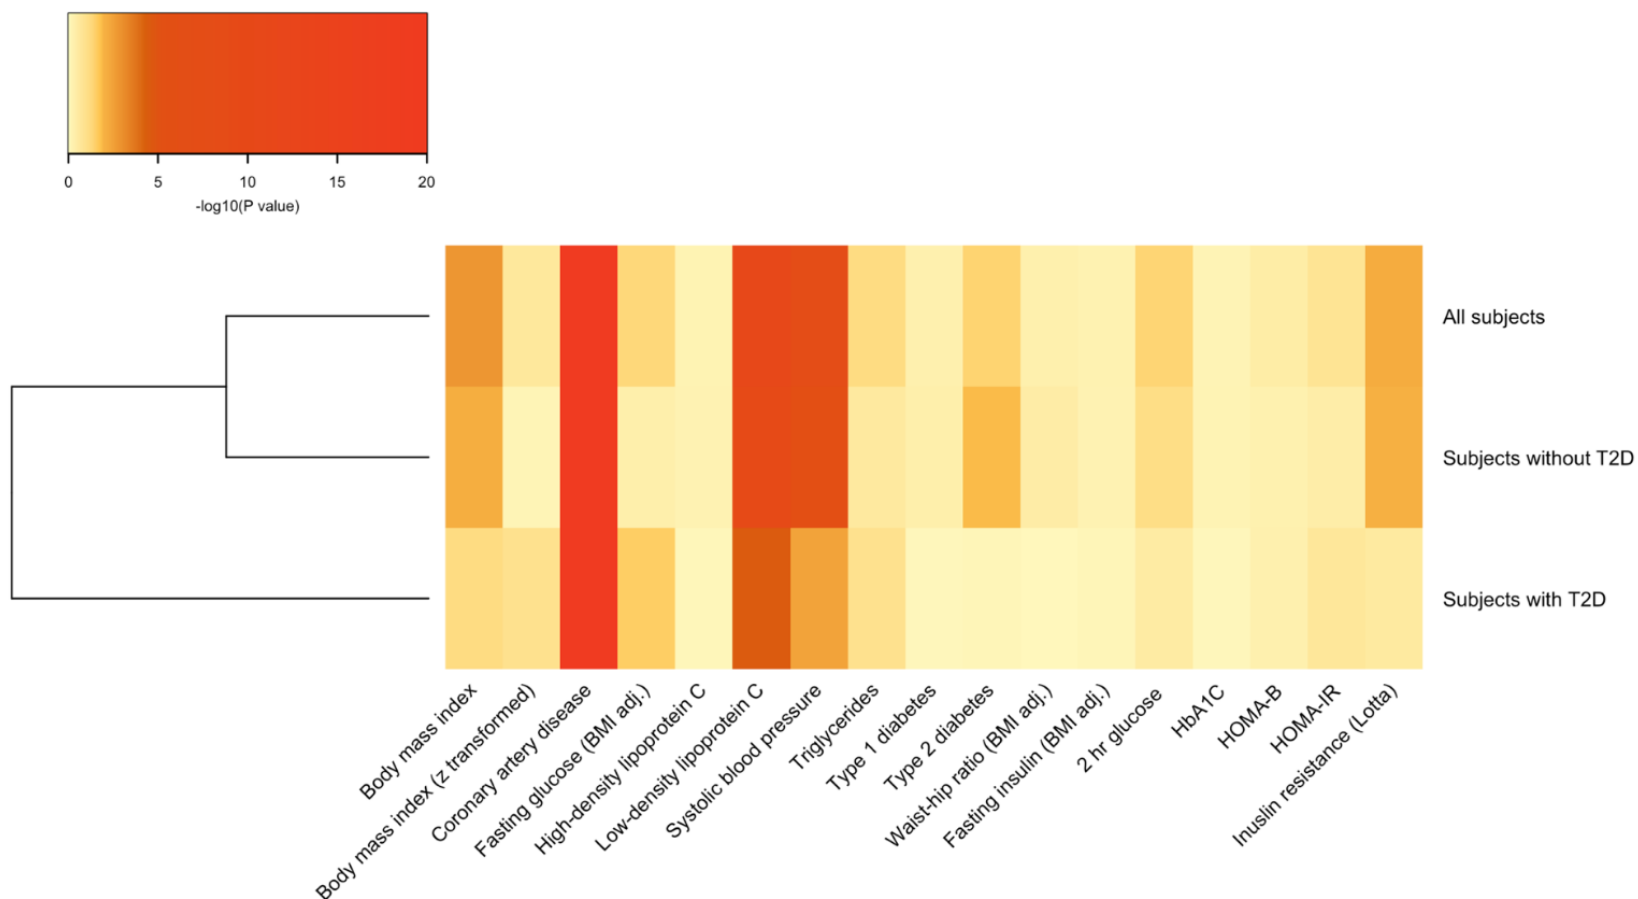

**Supplementary Figure 5:** The heat map of genetic risk scores for known coronary artery disease (CAD) risk factors does not show any significant differences between CAD in subjects with and without diabetes. Genetic risk scores (GRS) were for known CAD risk factors were constructed and associated with CAD in all individuals, CAD in subjects without T2D and with CAD in subjects with T2D. This was to determine if there was a different effect of risk factors on CAD by T2D background. Similar colours indicate a similar strength of association between the GRS for the known CAD risk factor and CAD in the different contexts examined.

**Supplementary Table 1:** The discovery meta-analysis included 24 studies and the sample characteristics of those studies are provided in the accompanying excel file.

**Supplementary Table 2:** Phenotypic characteristics of the 4 studies that were included in the replication meta-analyses

| STUDY                 | HPFS                                                                                                                                                                                                                                                                                                                                                                                                                                                                                 | NHS                                                                                                                                                                                                                                                                                                                                                                                                                                                                                  | METSIM                                                                                               | DECODE                                                                                                                                                                                                                                                                                                                                                                                                                                                                                                                |
|-----------------------|--------------------------------------------------------------------------------------------------------------------------------------------------------------------------------------------------------------------------------------------------------------------------------------------------------------------------------------------------------------------------------------------------------------------------------------------------------------------------------------|--------------------------------------------------------------------------------------------------------------------------------------------------------------------------------------------------------------------------------------------------------------------------------------------------------------------------------------------------------------------------------------------------------------------------------------------------------------------------------------|------------------------------------------------------------------------------------------------------|-----------------------------------------------------------------------------------------------------------------------------------------------------------------------------------------------------------------------------------------------------------------------------------------------------------------------------------------------------------------------------------------------------------------------------------------------------------------------------------------------------------------------|
| FULL NAME             | The Health Professionals Follow-Up Study                                                                                                                                                                                                                                                                                                                                                                                                                                             | The Nurses' Health Study                                                                                                                                                                                                                                                                                                                                                                                                                                                             | The Metabolic Syndrome In Men Study                                                                  | deCODE Study                                                                                                                                                                                                                                                                                                                                                                                                                                                                                                          |
| REFERENCE             | PMID: 23982368                                                                                                                                                                                                                                                                                                                                                                                                                                                                       | PMID: 23982368                                                                                                                                                                                                                                                                                                                                                                                                                                                                       | PMID: 19223598                                                                                       | PMID: 27192541                                                                                                                                                                                                                                                                                                                                                                                                                                                                                                        |
| ETHNICITY             | Caucasian                                                                                                                                                                                                                                                                                                                                                                                                                                                                            | Caucasian                                                                                                                                                                                                                                                                                                                                                                                                                                                                            | European                                                                                             | European                                                                                                                                                                                                                                                                                                                                                                                                                                                                                                              |
| REGION OF RECRUITMENT | The U.S.                                                                                                                                                                                                                                                                                                                                                                                                                                                                             | The U.S.                                                                                                                                                                                                                                                                                                                                                                                                                                                                             | Finland                                                                                              | Iceland                                                                                                                                                                                                                                                                                                                                                                                                                                                                                                               |
| PHENOTYPE             | CHD                                                                                                                                                                                                                                                                                                                                                                                                                                                                                  | CHD                                                                                                                                                                                                                                                                                                                                                                                                                                                                                  | CAD                                                                                                  | CAD                                                                                                                                                                                                                                                                                                                                                                                                                                                                                                                   |
| PHENOTYPE DEFINITION  | Nonfatal CHD was confirmed using the criteria of the World Health Organization, specifically, on the basis of symptoms and either electrocardiographic changes or elevated cardiac enzyme concentrations. Fatal CHD was defined as fatal myocardial infarction if this was confirmed by hospital records or autopsy, or if CHD was listed as the cause of death on the certificate and this was the underlying and only plausible cause, and evidence of previous CHD was available. | Nonfatal CHD was confirmed using the criteria of the World Health Organization, specifically, on the basis of symptoms and either electrocardiographic changes or elevated cardiac enzyme concentrations. Fatal CHD was defined as fatal myocardial infarction if this was confirmed by hospital records or autopsy, or if CHD was listed as the cause of death on the certificate and this was the underlying and only plausible cause, and evidence of previous CHD was available. | Hospital admission codes and death records for: MI/Unstable Angina/Coronary procedures (PTCA & CABG) | Coronary artery disease (CAD) was defined as a) individuals in the MONICA registry who suffered myocardial infarction (MI) before the age of 75 in Iceland between 1981 and 2002 and satisfied the MONICA criteria <sup>1</sup> , b) subjects with CAD discharge diagnoses (ICD 9 codes 410.*, 411.*, 412.*, 414.* or ICD 10 codes I20.0, I21.*, I22.*, I23.*, I24.*, I25.*) from LUH, c) subjects diagnosed with significant angiographic CAD (see below) identified from a nationwide clinical registry of coronary |

| STUDY | HPFS | NHS | METSIM | DECODE                                                                                                                                                                                                                                                                                                                                                                                                                                                                                                                                                                                                                                                                                           |
|-------|------|-----|--------|--------------------------------------------------------------------------------------------------------------------------------------------------------------------------------------------------------------------------------------------------------------------------------------------------------------------------------------------------------------------------------------------------------------------------------------------------------------------------------------------------------------------------------------------------------------------------------------------------------------------------------------------------------------------------------------------------|
|       |      |     |        | <p>angiography and percutaneous coronary interventions at LUH between the years 1987 and 2012, d) subjects undergoing coronary artery bypass grafting (CABG) procedures at LUH between the years 2002 and 2011 and e) cause of death or contributing cause of death listed as MI or CAD (ICD 9 or 10 codes) on death registries between the years 1996 and 2009. Coronary angiograms in the nationwide registry were evaluated by an interventional cardiologist. Patients were considered to have significant angiographic CAD if one or more of the three major epicardial coronary vessels or the left main coronary artery was found to have at least 50% stenosis by visual estimation.</p> |

| STUDY                                              | HPFS                                                                                                                                                                                           | NHS                                                                                                                                                                                            | METSIM                      | DECODE                                            |
|----------------------------------------------------|------------------------------------------------------------------------------------------------------------------------------------------------------------------------------------------------|------------------------------------------------------------------------------------------------------------------------------------------------------------------------------------------------|-----------------------------|---------------------------------------------------|
| CONTROL DEFINITION                                 | CHD controls were selected randomly and matched in a 1:2 ratio on age, smoking, and month of blood return, among participants who were free of CVD and T2D when CHD was diagnosed in the case. | CHD controls were selected randomly and matched in a 1:2 ratio on age, smoking, and month of blood return, among participants who were free of CVD and T2D when CHD was diagnosed in the case. | Controls free of CAD        | Population controls without known history of CAD. |
| MEAN AGE (SD) YEARS [CASES/CONTROLS] - AGE AT CATH |                                                                                                                                                                                                |                                                                                                                                                                                                | 62.12 (6.40) / 57.07 (7.00) | 66.9 (12.9) / 57.7 (17.6)                         |
| N CAD/MI [CASES/CONTROLS]                          | 750/1403                                                                                                                                                                                       | 644/1689                                                                                                                                                                                       | 1173/8999                   | 14156 / 89340                                     |
| N DIABETIC CAD/MI [CASES/CONTROLS]                 | 385/646                                                                                                                                                                                        | 314/918                                                                                                                                                                                        | 391/1579                    | 2619 / 4712                                       |
| N NON-DIABETIC CAD/MI CASES [CASES/CONTROLS]       | 365/756                                                                                                                                                                                        | 330/771                                                                                                                                                                                        | 782/7420                    | 11537 / 84628                                     |
| % EVER SMOKER CAD/MI [CASES/CONTROLS]              |                                                                                                                                                                                                |                                                                                                                                                                                                | 17.0%/18.2 %                | 54.3% / 38.8%                                     |
| BMI DIABETIC CAD/MI [CASES/CONTROLS]               |                                                                                                                                                                                                |                                                                                                                                                                                                | 29.78 (4.64) / 29.90 (5.05) | 29.3 (5.3) / 30.3 (6.1)                           |
| BMI NON-DIABETIC CAD/MI [CASES/CONTROLS]           |                                                                                                                                                                                                |                                                                                                                                                                                                | 27.01 (3.83) / 26.63 (3.71) | 26.5 (4.4) / 26.5 (5.0)                           |

**Supplementary Table 3:** The phenotypic characteristics of studies included in the discovery meta-analysis can be found in the accompanying excel file.

**Supplementary Table 4:** Genotypic characteristics of the four studies that were included in the replication analyses.

| <b>STUDY NAME</b>        | <b>HPFS</b>                                         | <b>NHS</b>                                          | <b>METSIM</b>                                                                             | <b>DECODE</b>                                                                                                               |
|--------------------------|-----------------------------------------------------|-----------------------------------------------------|-------------------------------------------------------------------------------------------|-----------------------------------------------------------------------------------------------------------------------------|
| <b>GENOTYPING CENTRE</b> | <b>The Broad Center for Genotyping and Analysis</b> | <b>The Broad Center for Genotyping and Analysis</b> | <b>NHGRI</b>                                                                              | <b>deCODE</b>                                                                                                               |
| <b>GENOTYPING ARRAY</b>  | <b>Affymetrix Genome-Wide Human 6.0 array</b>       | <b>Affymetrix Genome-Wide Human 6.0 array</b>       | <b>HumanOmniExpress-12v1 or HumanExome-12v1_A</b>                                         | <b>Illumina HumanHap300, HumanCNV370, HumanHap610, HumanHap1M, HumanHap660, Omni-1, Omni 2.5 or Omni Express bead chips</b> |
| <b>CALLING ALGORITHM</b> | <b>the Birdseed calling algorithm</b>               | <b>the Birdseed calling algorithm</b>               | <b>GenomeStudio version 2011.1, Genotyping Module version 1.9.4, GenTrain version 1.0</b> | <b>GenomeStudio</b>                                                                                                         |



| STUDY NAME                             | HPFS                                                                                                                                                                                                                                                                                                                                            | NHS                                                                                                                                                                                                                                                                                                                                             | METSIM | DECODE                                                                                                                                                                                                                                                                                                                                                                                                                                                                                                                                          |
|----------------------------------------|-------------------------------------------------------------------------------------------------------------------------------------------------------------------------------------------------------------------------------------------------------------------------------------------------------------------------------------------------|-------------------------------------------------------------------------------------------------------------------------------------------------------------------------------------------------------------------------------------------------------------------------------------------------------------------------------------------------|--------|-------------------------------------------------------------------------------------------------------------------------------------------------------------------------------------------------------------------------------------------------------------------------------------------------------------------------------------------------------------------------------------------------------------------------------------------------------------------------------------------------------------------------------------------------|
| PRE-IMPUTATION QC - EXCLUSION CRITERIA | <p>Genotypic data first passed Broad's initial QC which included SNP fingerprints for sample tracking and early detection of sample misidentification, missing call rates of <math>\geq 5\%</math>, the use of a HapMap control to check genotype quality independent of study samples and tracking of reagent and instrumental performance</p> | <p>Genotypic data first passed Broad's initial QC which included SNP fingerprints for sample tracking and early detection of sample misidentification, missing call rates of <math>\geq 5\%</math>, the use of a HapMap control to check genotype quality independent of study samples and tracking of reagent and instrumental performance</p> |        | <p>Chip SNPs were excluded if they had (i) yield less than 95%, (ii) minor allele frequency (MAF) less than 1% in the population or (iii) significant deviation from Hardy-Weinberg equilibrium (<math>P &lt; 0.001</math>), (iv) if they produced an excessive inheritance error rate (over 0.001), (v) if there was substantial difference in allele frequency between chip types (from just a single chip if that resolved all differences, but from all chips otherwise). All samples with a call rate below 97% were excluded from the</p> |

| STUDY NAME                                                            | HPFS                | NHS                 | METSIM              | DECODE                                                       |
|-----------------------------------------------------------------------|---------------------|---------------------|---------------------|--------------------------------------------------------------|
|                                                                       |                     |                     |                     | analysis. Individuals not of Icelandic origin were excluded. |
| SAMPLE CALL RATE                                                      | >98%                | >98%                | 99%                 | >97%                                                         |
| SNP CALL RATE                                                         | >99%                | >99%                | >95%                | >95%                                                         |
| HWE                                                                   |                     |                     | >0.00029            | P > 0.001                                                    |
| IMPUTATION SOFTWARE                                                   | MACH                | MACH                |                     | deCode's imputation pipeline                                 |
| REFERENCE PANEL                                                       | NCBI build 37       | NCBI build 37       |                     | 2636 WGS Icelanders                                          |
| ANALYSIS SOFTWARE                                                     | Plink               | Plink               | Plink               | R                                                            |
| ANALYSIS MODEL                                                        | Logistic regression | Logistic regression | Logistic regression | Logistic regression                                          |
| TOTAL SNPS INCLUDED IN ANALYSIS DIABETIC ONLY [GENOTYPED/IMPUTED]     | 456                 | 456                 | 290                 | 646 / 0                                                      |
| TOTAL SNPS INCLUDED IN ANALYSIS NON-DIABETIC ONLY [GENOTYPED/IMPUTED] | 548                 | 548                 | 330                 | 646 / 0                                                      |

**Supplementary Table 5:** Results from the T2D stratified analysis for SNPs in known coronary artery disease loci (N=160) in the combined, T2D only and non-diabetic analyses. This table shows the odds ratios from each of the analyses performed and reports the published odds ratio.

The table is available in the supplementary excel file

**Supplementary Table 6:** Pairwise genetic correlation between 106 traits and coronary artery disease (CAD) stratified by type 2 diabetes (T2D) status using data from LD Score hub. Genetic correlations indicate the overall genetic overlap between traits. Here we wanted to understand the genetic overlap of known CAD risk factors with CAD in the context of T2D.

| Coronary Artery Disease      | Category       | Trait                | PMID     | rg    | se   | p                    |
|------------------------------|----------------|----------------------|----------|-------|------|----------------------|
| In subjects with diabetes    | Aging          | Fathers age at death | 27015805 | -0.81 | 0.35 | 0.02                 |
| In subjects without diabetes | Aging          | Fathers age at death | 27015805 | -0.44 | 0.12 | 2.0×10 <sup>-4</sup> |
| In subjects with diabetes    | Aging          | Mothers age at death | 27015805 | -0.23 | 0.24 | 0.34                 |
| In subjects without diabetes | Aging          | Mothers age at death | 27015805 | -0.36 | 0.14 | 0.01                 |
| In subjects with diabetes    | Aging          | Parents age at death | 27015805 | -0.43 | 0.27 | 0.11                 |
| In subjects without diabetes | Aging          | Parents age at death | 27015805 | -0.39 | 0.16 | 0.01                 |
| In subjects with diabetes    | Anthropometric | Birth weight         | 27680694 | -0.15 | 0.13 | 0.25                 |
| In subjects without diabetes | Anthropometric | Birth weight         | 27680694 | -0.04 | 0.08 | 0.64                 |
| In subjects with diabetes    | Anthropometric | Body fat             | 26833246 | 0.15  | 0.17 | 0.36                 |
| In subjects without diabetes | Anthropometric | Body fat             | 26833246 | 0.05  | 0.07 | 0.50                 |
| In subjects with diabetes    | Anthropometric | Body mass index      | 20935630 | 0.22  | 0.12 | 0.06                 |
| In subjects without diabetes | Anthropometric | Body mass index      | 20935630 | 0.05  | 0.06 | 0.44                 |

| <b>Coronary Artery Disease</b> | <b>Category</b> | <b>Trait</b>                                                   | <b>PMID</b> | <b>rg</b> | <b>se</b> | <b>p</b> |
|--------------------------------|-----------------|----------------------------------------------------------------|-------------|-----------|-----------|----------|
| In subjects with diabetes      | Anthropometric  | Child birth length                                             | 25281659    | 0.34      | 0.22      | 0.13     |
| In subjects without diabetes   | Anthropometric  | Child birth length                                             | 25281659    | 0.07      | 0.12      | 0.57     |
| In subjects with diabetes      | Anthropometric  | Child birth weight                                             | 23202124    | -0.04     | 0.21      | 0.84     |
| In subjects without diabetes   | Anthropometric  | Child birth weight                                             | 23202124    | 0.17      | 0.12      | 0.16     |
| In subjects with diabetes      | Anthropometric  | Childhood obesity                                              | 22484627    | 0.15      | 0.18      | 0.41     |
| In subjects without diabetes   | Anthropometric  | Childhood obesity                                              | 22484627    | -0.03     | 0.09      | 0.74     |
| In subjects with diabetes      | Anthropometric  | Difference in height between adolescence and adulthood; age 14 | 23449627    | -0.49     | 0.30      | 0.10     |
| In subjects without diabetes   | Anthropometric  | Difference in height between adolescence and adulthood; age 14 | 23449627    | 0.15      | 0.15      | 0.30     |
| In subjects with diabetes      | Anthropometric  | Difference in height between childhood and adulthood; age 8    | 23449627    | -0.19     | 0.21      | 0.37     |
| In subjects without diabetes   | Anthropometric  | Difference in height between childhood and adulthood; age 8    | 23449627    | -0.09     | 0.11      | 0.40     |
| In subjects with diabetes      | Anthropometric  | Extreme bmi                                                    | 23563607    | 0.19      | 0.18      | 0.31     |
| In subjects without diabetes   | Anthropometric  | Extreme bmi                                                    | 23563607    | 0.13      | 0.09      | 0.13     |
| In subjects with diabetes      | Anthropometric  | Extreme height                                                 | 23563607    | -0.24     | 0.20      | 0.22     |
| In subjects without diabetes   | Anthropometric  | Extreme height                                                 | 23563607    | -0.03     | 0.07      | 0.73     |

| <b>Coronary Artery Disease</b> | <b>Category</b> | <b>Trait</b>                                  | <b>PMID</b> | <b>rg</b> | <b>se</b> | <b>p</b> |
|--------------------------------|-----------------|-----------------------------------------------|-------------|-----------|-----------|----------|
| In subjects with diabetes      | Anthropometric  | Extreme waist-to-hip ratio                    | 23563607    | 0.26      | 0.27      | 0.34     |
| In subjects without diabetes   | Anthropometric  | Extreme waist-to-hip ratio                    | 23563607    | 0.17      | 0.15      | 0.24     |
| In subjects with diabetes      | Anthropometric  | Height 2010                                   | 20881960    | -0.14     | 0.09      | 0.13     |
| In subjects without diabetes   | Anthropometric  | Height 2010                                   | 20881960    | -0.11     | 0.05      | 0.04     |
| In subjects with diabetes      | Anthropometric  | Height; Females at age 10 and males at age 12 | 23449627    | 0.25      | 0.17      | 0.15     |
| In subjects without diabetes   | Anthropometric  | Height; Females at age 10 and males at age 12 | 23449627    | 0.18      | 0.10      | 0.06     |
| In subjects with diabetes      | Anthropometric  | Hip circumference                             | 25673412    | 0.11      | 0.19      | 0.57     |
| In subjects without diabetes   | Anthropometric  | Hip circumference                             | 25673412    | 0.04      | 0.07      | 0.52     |
| In subjects with diabetes      | Anthropometric  | Infant head circumference                     | 22504419    | 0.35      | 0.27      | 0.18     |
| In subjects without diabetes   | Anthropometric  | Infant head circumference                     | 22504419    | 0.01      | 0.15      | 0.95     |
| In subjects with diabetes      | Anthropometric  | Obesity class 1                               | 23563607    | 0.16      | 0.12      | 0.18     |
| In subjects without diabetes   | Anthropometric  | Obesity class 1                               | 23563607    | 0.05      | 0.07      | 0.48     |
| In subjects with diabetes      | Anthropometric  | Obesity class 2                               | 23563607    | 0.00      | 0.15      | 0.99     |
| In subjects without diabetes   | Anthropometric  | Obesity class 2                               | 23563607    | 0.09      | 0.09      | 0.32     |

| <b>Coronary Artery Disease</b> | <b>Category</b> | <b>Trait</b>            | <b>PMID</b> | <b>rg</b> | <b>se</b> | <b>p</b>              |
|--------------------------------|-----------------|-------------------------|-------------|-----------|-----------|-----------------------|
| In subjects with diabetes      | Anthropometric  | Obesity class 3         | 23563607    | 0.04      | 0.24      | 0.88                  |
| In subjects without diabetes   | Anthropometric  | Obesity class 3         | 23563607    | 0.20      | 0.11      | 0.08                  |
| In subjects with diabetes      | Anthropometric  | Overweight              | 23563607    | 0.21      | 0.14      | 0.12                  |
| In subjects without diabetes   | Anthropometric  | Overweight              | 23563607    | 0.02      | 0.07      | 0.73                  |
| In subjects with diabetes      | Anthropometric  | Sitting height ratio    | 25865494    | -0.25     | 0.19      | 0.18                  |
| In subjects without diabetes   | Anthropometric  | Sitting height ratio    | 25865494    | -0.05     | 0.11      | 0.67                  |
| In subjects with diabetes      | Anthropometric  | Waist circumference     | 25673412    | 0.31      | 0.29      | 0.28                  |
| In subjects without diabetes   | Anthropometric  | Waist circumference     | 25673412    | 0.09      | 0.07      | 0.15                  |
| In subjects with diabetes      | Anthropometric  | Waist-to-hip ratio      | 25673412    | 0.18      | 0.11      | 0.12                  |
| In subjects without diabetes   | Anthropometric  | Waist-to-hip ratio      | 25673412    | 0.11      | 0.06      | 0.09                  |
| In subjects with diabetes      | Cardiometabolic | Adiponectin             | 22479202    | -0.31     | 0.26      | 0.23                  |
| In subjects without diabetes   | Cardiometabolic | Adiponectin             | 22479202    | -0.23     | 0.14      | 0.11                  |
| In subjects with diabetes      | Cardiometabolic | Coronary artery disease | 26343387    | 1.03      | 0.28      | $3.0 \times 10^{-4}$  |
| In subjects without diabetes   | Cardiometabolic | Coronary artery disease | 26343387    | 0.58      | 0.07      | $1.1 \times 10^{-16}$ |

| <b>Coronary Artery Disease</b> | <b>Category</b> | <b>Trait</b>                                     | <b>PMID</b> | <b>rg</b> | <b>se</b> | <b>p</b> |
|--------------------------------|-----------------|--------------------------------------------------|-------------|-----------|-----------|----------|
| In subjects with diabetes      | Cognitive       | Intelligence                                     | 28530673    | -0.17     | 0.13      | 0.19     |
| In subjects without diabetes   | Cognitive       | Intelligence                                     | 28530673    | -0.11     | 0.06      | 0.09     |
| In subjects with diabetes      | Education       | Childhood IQ                                     | 23358156    | 0.14      | 0.20      | 0.47     |
| In subjects without diabetes   | Education       | Childhood IQ                                     | 23358156    | -0.10     | 0.13      | 0.45     |
| In subjects with diabetes      | Education       | College completion                               | 23722424    | -0.39     | 0.17      | 0.02     |
| In subjects without diabetes   | Education       | College completion                               | 23722424    | -0.01     | 0.08      | 0.92     |
| In subjects with diabetes      | Education       | Years of schooling (proxy cognitive performance) | 25201988    | -0.32     | 0.15      | 0.03     |
| In subjects without diabetes   | Education       | Years of schooling (proxy cognitive performance) | 25201988    | -0.09     | 0.08      | 0.22     |
| In subjects with diabetes      | Education       | Years of schooling 2013                          | 23722424    | -0.33     | 0.15      | 0.03     |
| In subjects without diabetes   | Education       | Years of schooling 2013                          | 23722424    | -0.10     | 0.08      | 0.21     |
| In subjects with diabetes      | Education       | Years of schooling 2016                          | 27225129    | -0.23     | 0.10      | 0.03     |
| In subjects without diabetes   | Education       | Years of schooling 2016                          | 27225129    | -0.09     | 0.05      | 0.09     |
| In subjects with diabetes      | Glycemic        | 2hr glucose adjusted for BMI                     | 20081857    | 0.44      | 0.34      | 0.20     |
| In subjects without diabetes   | Glycemic        | 2hr glucose adjusted for BMI                     | 20081857    | -0.16     | 0.20      | 0.44     |



| <b>Coronary Artery Disease</b> | <b>Category</b> | <b>Trait</b>                | <b>PMID</b> | <b>rg</b> | <b>se</b> | <b>p</b> |
|--------------------------------|-----------------|-----------------------------|-------------|-----------|-----------|----------|
| In subjects with diabetes      | Glycemic        | Fasting glucose main effect | 22581228    | 0.24      | 0.19      | 0.22     |
| In subjects without diabetes   | Glycemic        | Fasting glucose main effect | 22581228    | -0.12     | 0.10      | 0.25     |
| In subjects with diabetes      | Glycemic        | Fasting insulin main effect | 22581228    | 0.15      | 0.20      | 0.46     |
| In subjects without diabetes   | Glycemic        | Fasting insulin main effect | 22581228    | 0.06      | 0.12      | 0.62     |
| In subjects with diabetes      | Glycemic        | Fasting proinsulin          | 20081858    | -0.62     | 0.36      | 0.09     |
| In subjects without diabetes   | Glycemic        | Fasting proinsulin          | 20081858    | 0.04      | 0.15      | 0.79     |
| In subjects with diabetes      | Glycemic        | HbA1C                       | 20858683    | 0.07      | 0.21      | 0.75     |
| In subjects without diabetes   | Glycemic        | HbA1C                       | 20858683    | 0.14      | 0.13      | 0.30     |
| In subjects with diabetes      | Glycemic        | HOMA-B                      | 20081858    | -0.09     | 0.24      | 0.69     |
| In subjects without diabetes   | Glycemic        | HOMA-B                      | 20081858    | 0.12      | 0.13      | 0.36     |
| In subjects with diabetes      | Glycemic        | HOMA-IR                     | 20081858    | 0.09      | 0.26      | 0.72     |
| In subjects without diabetes   | Glycemic        | HOMA-IR                     | 20081858    | -0.20     | 0.13      | 0.12     |
| In subjects with diabetes      | Glycemic        | Type 2 Diabetes             | 22885922    | 0.46      | 0.22      | 0.03     |
| In subjects without diabetes   | Glycemic        | Type 2 Diabetes             | 22885922    | 0.01      | 0.10      | 0.96     |

| <b>Coronary Artery Disease</b> | <b>Category</b> | <b>Trait</b>       | <b>PMID</b> | <b>rg</b> | <b>se</b> | <b>p</b> |
|--------------------------------|-----------------|--------------------|-------------|-----------|-----------|----------|
| In subjects with diabetes      | Lipids          | HDL cholesterol    | 20686565    | -0.01     | 0.18      | 0.94     |
| In subjects without diabetes   | Lipids          | HDL cholesterol    | 20686565    | -0.15     | 0.09      | 0.10     |
| In subjects with diabetes      | Lipids          | LDL cholesterol    | 20686565    | 0.09      | 0.15      | 0.56     |
| In subjects without diabetes   | Lipids          | LDL cholesterol    | 20686565    | 0.27      | 0.10      | 0.01     |
| In subjects with diabetes      | Lipids          | Total Cholesterol  | 20686565    | 0.23      | 0.15      | 0.12     |
| In subjects without diabetes   | Lipids          | Total Cholesterol  | 20686565    | 0.22      | 0.09      | 0.01     |
| In subjects with diabetes      | Lipids          | Triglycerides      | 20686565    | 0.32      | 0.16      | 0.05     |
| In subjects without diabetes   | Lipids          | Triglycerides      | 20686565    | 0.20      | 0.08      | 0.01     |
| In subjects with diabetes      | Reproductive    | Age at Menarche    | 25231870    | -0.10     | 0.10      | 0.31     |
| In subjects without diabetes   | Reproductive    | Age at Menarche    | 25231870    | 0.05      | 0.05      | 0.35     |
| In subjects with diabetes      | Reproductive    | Age at Menopause   | 26414677    | -0.18     | 0.17      | 0.29     |
| In subjects without diabetes   | Reproductive    | Age at Menopause   | 26414677    | -0.05     | 0.09      | 0.61     |
| In subjects with diabetes      | Reproductive    | Age of first birth | 27798627    | -0.25     | 0.13      | 0.05     |
| In subjects without diabetes   | Reproductive    | Age of first birth | 27798627    | -0.08     | 0.07      | 0.27     |

| <b>Coronary Artery Disease</b> | <b>Category</b>   | <b>Trait</b>                 | <b>PMID</b> | <b>rg</b> | <b>se</b> | <b>p</b> |
|--------------------------------|-------------------|------------------------------|-------------|-----------|-----------|----------|
| In subjects with diabetes      | Reproductive      | Number of children ever born | 27798627    | -0.29     | 0.16      | 0.07     |
| In subjects without diabetes   | Reproductive      | Number of children ever born | 27798627    | -0.07     | 0.09      | 0.40     |
| In subjects with diabetes      | Smoking behaviour | Age of smoking initiation    | 20418890    | -0.74     | 0.35      | 0.03     |
| In subjects without diabetes   | Smoking behaviour | Age of smoking initiation    | 20418890    | -0.10     | 0.16      | 0.53     |
| In subjects with diabetes      | Smoking behaviour | Cigarettes smoked per day    | 20418890    | -0.23     | 0.26      | 0.37     |
| In subjects without diabetes   | Smoking behaviour | Cigarettes smoked per day    | 20418890    | -0.07     | 0.15      | 0.63     |
| In subjects with diabetes      | Smoking behaviour | Ever vs never smoked         | 20418890    | 0.28      | 0.20      | 0.15     |
| In subjects without diabetes   | Smoking behaviour | Ever vs never smoked         | 20418890    | 0.23      | 0.10      | 0.02     |
| In subjects with diabetes      | Smoking behaviour | Former vs Current smoker     | 20418890    | 0.34      | 0.22      | 0.13     |
| In subjects without diabetes   | Smoking behaviour | Former vs Current smoker     | 20418890    | 0.05      | 0.14      | 0.71     |

**Supplementary Table 7:** Coronary artery disease (CAD) has several risk factors that are in part genetically determined. We constructed genetic risk scores for known CAD risk factors and associated them with CAD by type 2 diabetes status.

| CAD score            | Risk Factor                     | OR   | L95  | U95  | P                      |
|----------------------|---------------------------------|------|------|------|------------------------|
| All subjects         | Body mass index                 | 1.06 | 1.02 | 1.09 | $1.6 \times 10^{-3}$   |
| Subjects with T2D    | Body mass index                 | 1.05 | 1.00 | 1.10 | 0.07                   |
| Subjects without T2D | Body mass index                 | 1.06 | 1.02 | 1.11 | $7.1 \times 10^{-3}$   |
| All subjects         | Body mass index (z transformed) | 1.08 | 0.95 | 1.22 | 0.23                   |
| Subjects with T2D    | Body mass index (z transformed) | 1.16 | 0.96 | 1.41 | 0.12                   |
| Subjects without T2D | Body mass index (z transformed) | 1.03 | 0.88 | 1.20 | 0.75                   |
| All subjects         | Coronary artery disease         | 2.12 | 2.01 | 2.24 | $6.4 \times 10^{-171}$ |
| Subjects with T2D    | Coronary artery disease         | 2.05 | 1.88 | 2.23 | $1.1 \times 10^{-59}$  |
| Subjects without T2D | Coronary artery disease         | 2.18 | 2.04 | 2.33 | $8.5 \times 10^{-117}$ |
| All subjects         | Fasting glucose (BMI adj.)      | 1.56 | 1.00 | 2.42 | 0.05                   |
| Subjects with T2D    | Fasting glucose (BMI adj.)      | 2.13 | 1.08 | 4.21 | 0.03                   |
| Subjects without T2D | Fasting glucose (BMI adj.)      | 1.23 | 0.70 | 2.18 | 0.47                   |
| All subjects         | High-density lipoprotein C      | 0.97 | 0.86 | 1.10 | 0.66                   |
| Subjects with T2D    | High-density lipoprotein C      | 0.99 | 0.84 | 1.17 | 0.89                   |
| Subjects without T2D | High-density lipoprotein C      | 0.96 | 0.83 | 1.12 | 0.62                   |
| All subjects         | Low-density lipoprotein C       | 1.37 | 1.25 | 1.50 | $1.0 \times 10^{-11}$  |
| Subjects with T2D    | Low-density lipoprotein C       | 1.32 | 1.16 | 1.50 | $3.3 \times 10^{-5}$   |
| Subjects without T2D | Low-density lipoprotein C       | 1.43 | 1.28 | 1.60 | $6.6 \times 10^{-10}$  |
| All subjects         | Systolic blood pressure         | 1.66 | 1.39 | 1.98 | $1.7 \times 10^{-8}$   |
| Subjects with T2D    | Systolic blood pressure         | 1.58 | 1.16 | 2.16 | $3.7 \times 10^{-3}$   |
| Subjects without T2D | Systolic blood pressure         | 1.70 | 1.37 | 2.10 | $9.9 \times 10^{-7}$   |
| All subjects         | Triglycerides                   | 1.14 | 0.99 | 1.30 | 0.07                   |
| Subjects with T2D    | Triglycerides                   | 1.16 | 0.96 | 1.41 | 0.12                   |

| <b>CAD score</b>     | <b>Risk Factor</b>         | <b>OR</b> | <b>L95</b> | <b>U95</b> | <b>P</b>             |
|----------------------|----------------------------|-----------|------------|------------|----------------------|
| Subjects without T2D | Triglycerides              | 1.11      | 0.93       | 1.33       | 0.26                 |
| All subjects         | Type 1 diabetes            | 1.00      | 0.99       | 1.02       | 0.53                 |
| Subjects with T2D    | Type 1 diabetes            | 1.00      | 0.98       | 1.02       | 0.95                 |
| Subjects without T2D | Type 1 diabetes            | 1.01      | 0.99       | 1.02       | 0.46                 |
| All subjects         | Type 2 diabetes            | 1.04      | 1.00       | 1.08       | 0.04                 |
| Subjects with T2D    | Type 2 diabetes            | 0.99      | 0.94       | 1.05       | 0.85                 |
| Subjects without T2D | Type 2 diabetes            | 1.06      | 1.01       | 1.11       | 0.01                 |
| All subjects         | Waist-hip ratio (BMI adj.) | 0.80      | 0.41       | 1.57       | 0.51                 |
| Subjects with T2D    | Waist-hip ratio (BMI adj.) | 1.01      | 0.36       | 2.82       | 0.99                 |
| Subjects without T2D | Waist-hip ratio (BMI adj.) | 0.66      | 0.27       | 1.60       | 0.36                 |
| All subjects         | Fasting insulin (BMI adj.) | 1.17      | 0.64       | 2.14       | 0.62                 |
| Subjects with T2D    | Fasting insulin (BMI adj.) | 1.12      | 0.44       | 2.84       | 0.82                 |
| Subjects without T2D | Fasting insulin (BMI adj.) | 1.20      | 0.55       | 2.63       | 0.65                 |
| All subjects         | 2 hr glucose               | 0.89      | 0.80       | 1.00       | 0.04                 |
| Subjects with T2D    | 2 hr glucose               | 0.91      | 0.76       | 1.09       | 0.31                 |
| Subjects without T2D | 2 hr glucose               | 0.89      | 0.77       | 1.02       | 0.08                 |
| All subjects         | HbA1C                      | 1.09      | 0.69       | 1.70       | 0.72                 |
| Subjects with T2D    | HbA1C                      | 1.02      | 0.50       | 2.09       | 0.95                 |
| Subjects without T2D | HbA1C                      | 1.12      | 0.64       | 1.98       | 0.69                 |
| All subjects         | HOMA-B                     | 1.18      | 0.82       | 1.70       | 0.38                 |
| Subjects with T2D    | HOMA-B                     | 1.21      | 0.68       | 2.15       | 0.52                 |
| Subjects without T2D | HOMA-B                     | 1.15      | 0.72       | 1.84       | 0.55                 |
| All subjects         | HOMA-IR                    | 0.67      | 0.39       | 1.17       | 0.16                 |
| Subjects with T2D    | HOMA-IR                    | 0.55      | 0.22       | 1.40       | 0.21                 |
| Subjects without T2D | HOMA-IR                    | 0.75      | 0.38       | 1.47       | 0.40                 |
| All subjects         | Insulin resistance (Lotta) | 1.01      | 1.00       | 1.01       | $6.3 \times 10^{-3}$ |
| Subjects with T2D    | Insulin resistance (Lotta) | 1.00      | 1.00       | 1.01       | 0.28                 |

| <b>CAD score</b>     | <b>Risk Factor</b>         | <b>OR</b> | <b>L95</b> | <b>U95</b> | <b>P</b> |
|----------------------|----------------------------|-----------|------------|------------|----------|
| Subjects without T2D | Insulin resistance (Lotta) | 1.01      | 1.00       | 1.01       | 0.01     |

**Supplementary Table 8:** CARDIoGRAMplusC4D Steering committee members

John Danesh

Department of Public Health and Primary Care, University of Cambridge, UK

Panos Deloukas

William Harvey research Institute, Barts and the London School of medicine & Dentistry, Queen Mary University of London, UK; Wellcome Trust Sanger Institute, Cambridge, UK

Jeanette Erdmann

Institut für Integrative und Experimentelle Genomik, Universität zu Lübeck, Lübeck, Germany

Dongfeng Gu

Department of Population Genetics and Prevention, Fu Wai Hospital & Cardiovascular Institute, Chinese Academy of Medical Sciences & Peking Union Medical College, Beijing, China

Anders Hamsten

Atherosclerosis Research Unit, Department of Medicine Solna, Karolinska Institutet, Stockholm, Sweden Center for Molecular Medicine and Department of Cardiology, Karolinska University Hospital, Stockholm, Sweden

Sekar Kathiresan

Cardiovascular Research Center and Center for Human Genetic Research, Massachusetts General Hospital, Boston, Massachusetts, USA; Broad Institute, Cambridge, Massachusetts, USA; Department of Medicine, Harvard Medical School, Boston, Massachusetts, USA

Jaspal S Kooner

National Heart and Lung Institute (NHLI), Imperial College London, Hammersmith Hospital, London, UK.

Robert Roberts

University of Ottawa Heart Institute, Cardiovascular Research Methods Centre and Ruddy Canadian Cardiovascular Genetics Centre, Ontario, Canada

Nilesh J Samani (Chair)

Department of Cardiovascular Sciences, University of Leicester, Glenfield Hospital, Leicester, UK; National Institute for Health Research (NIHR) Leicester Cardiovascular Biomedical Research Unit, Glenfield Hospital, Leicester, UK.

Heribert Schunkert

Deutsches Herzzentrum München, Technische Universität München, Munich, Germany

Unnur Thorsteinsdottir

deCODE Genetics, Sturlugata 8, Reykjavik, Iceland; University of Iceland, Faculty of Medicine, Reykjavik, Iceland

Hugh Watkins

Wellcome Centre for Human Genetics, University of Oxford, Oxford, UK; Cardiovascular Medicine, Radcliffe Department of Medicine, University of Oxford, Oxford, UK

Themistocles L Assimes

Department of Medicine, Stanford University School of Medicine, Stanford, California, USA

Email: tassimes@stanford.edu

Stefan Blankenberg

University Heart Center Hamburg, Clinic for general and interventional Cardiology, Hamburg, Germany

Bernhard O Boehm

Division of Endocrinology and Diabetes, Department of Internal Medicine, Ulm University Medical Centre, Ulm, Germany

John C Chambers

Epidemiology and Biostatistics, Imperial College London, London, UK

Robert Clarke

Clinical Trial Service Unit and Epidemiological Studies Unit, University of Oxford, Oxford, UK

Rory Collins

Clinical Trial Service Unit and Epidemiological Studies Unit, University of Oxford, Oxford, UK

George Dedoussis

Department of Dietetics-Nutrition, Harokopio University, Athens, Greece

Paul W Franks

Department of Clinical Sciences, Genetic & Molecular Epidemiology Unit, Lund University Diabetes Center, Skåne University Hospital, Malmö, Sweden Department of Public Health & Clinical Medicine, Genetic Epidemiology & Clinical Research Group, Section for Medicine, Umeå University, Umeå, Sweden; Department of Nutrition, Harvard School of Public Health, Boston, MA USA

G Kees Hovingh

Department of Vascular Medicine, Academic Medical Center, Amsterdam, The Netherlands

Erik Ingelsson

Department of Medical Epidemiology and Biostatistics, Karolinska Institutet, Stockholm, Sweden

Bong-Jo Kim

Division of Structural and Functional Genomics Center for Genome Science, Korea National Institute of Health, Korea

Terho Lehtimäki

Department of Clinical Chemistry, Fimlab Laboratories, Tampere University Hospital, Tampere, Finland; Department of Clinical Chemistry, University of Tampere School of Medicine, Tampere, Finland

Winfried März



Synlab Academy, Mannheim, Germany; Medical Clinic V (Nephrology • Hypertensiology • Endocrinology • Diabetology • Rheumatology), Medical Faculty of Mannheim, University of Heidelberg, Mannheim, Germany

Ruth McPherson

Department of Medicine, Division of Cardiology, University of Ottawa Heart Institute, Ottawa, Canada

Andres Metspalu

Estonian Genome Center, University of Tartu, Tartu, Estonia; Institute of Molecular and Cell Biology, University of Tartu, Tartu, Estonia

Markku S Nieminen

Division of Cardiology, Department of Medicine, Helsinki University Central Hospital (HUCH), Helsinki, Finland

Christopher O'Donnell

Framingham Heart Study, National Heart, Lung and Blood Institute, Framingham, MA 01702, USA

Colin N A Palmer

Medical Research Institute, University of Dundee, Ninewells Hospital and Medical School, Dundee, UK

Markus Perola

Department of Chronic Disease Prevention, National Institute for Health and Welfare, Helsinki, Finland

Muredach P Reilly

Cardiovascular Institute, Perelman School of Medicine at the University of Pennsylvania, Philadelphia, USA

Samuli Ripatti

Department of Chronic Disease Prevention, National Institute for Health and Welfare, Helsinki FIN-00271, Finland; Wellcome Trust Sanger Institute, Hinxton, UK

Danish Saleheen

Center for Non-Communicable Diseases, Karachi, Pakistan; Department of Public Health and Primary Care, University of Cambridge, Cambridge, UK; Department of Medicine, University of Pennsylvania, Philadelphia, Pennsylvania, USA

Manjinder S Sandhu

MRC Epidemiology Unit, Institute of Metabolic Science, Addenbrooke's Hospital, Cambridge, UK; Wellcome Trust Sanger Institute, Hinxton, UK

Stefan Schreiber

Institut für Klinische Molekularbiologie, Christian-Albrechts Universität, Kiel, Germany

Agneta Siegbahn

Uppsala Clinical Research Center, Uppsala University, Uppsala, Sweden

Cristen J Willer

Department of Internal Medicine , Division of Cardiovascular Medicine, and Department of Human Genetics, University of Michigan, Ann Arbor, Michigan, USA

Pierre A Zalloua

Lebanese American University, Chouran, Beirut, Lebanon

**Supplementary Table 9:** Members of the SUMMIT consortium

| Partner                         | Name                         | Position                                                                               |
|---------------------------------|------------------------------|----------------------------------------------------------------------------------------|
| <b>1</b>                        | <b>Michael Mark</b>          | <b>Coordinator, WP6 leader</b>                                                         |
| <b>Boehringer-Ingelheim</b>     | <b>Markus Albertini</b>      | <b>Project manager</b>                                                                 |
| <b>Ingelheim, Germany</b>       | <b>Carine Boustany</b>       | <b>Chronic Kidney Disease, Head of Lab</b>                                             |
|                                 | <b>Alexander Ehlgren</b>     | <b>Transmed</b>                                                                        |
|                                 | <b>Martin Gerl</b>           | <b>Biomarker &amp; Bioanalysis, Group leader</b>                                       |
|                                 | <b>Jochen Huber</b>          | <b>In vivo Scientist CMDR, Head of Lab</b>                                             |
|                                 | <b>Corinna Schölch</b>       | <b>Biomarker &amp; Bioanalysis, Head of Lab</b>                                        |
|                                 | <b>Heike Zimdahl-Gelling</b> | <b>Pharmacogenomics, Head of Lab</b>                                                   |
|                                 |                              |                                                                                        |
| <b>2</b>                        | <b>Leif Groop</b>            | <b>Prof. Endocrinology; Coordinator Managing entity IMI-JU; PI; WP1 and WP6 leader</b> |
| <b>Lund University</b>          | <b>Elisabet Agardh</b>       | <b>Prof. Ophthalmology</b>                                                             |
| <b>Clinical Research Centre</b> | <b>Emma Ahlqvist</b>         | <b>Postdoc</b>                                                                         |
| <b>Malmö, Sweden</b>            | <b>Tord Ajanki</b>           | <b>Communication strategist</b>                                                        |
|                                 | <b>Nibal Al Maghrabi</b>     | <b>Research nurse</b>                                                                  |
|                                 | <b>Peter Almgren</b>         | <b>Biostatistician</b>                                                                 |
|                                 | <b>Jan Apelqvist</b>         | <b>Diabetologist</b>                                                                   |
|                                 | <b>Eva Bengtsson</b>         | <b>Assis. Prof. Cardiovascular research</b>                                            |
|                                 | <b>Lisa Berglund</b>         | <b>Postdoc</b>                                                                         |
|                                 | <b>Harry Björckbacka</b>     | <b>Assis. Prof. Cardiovascular research</b>                                            |
|                                 | <b>Ulrika Blom-Nilsson</b>   | <b>LUDC administrator</b>                                                              |
|                                 | <b>Mattias Borell</b>        | <b>Website, server management</b>                                                      |
|                                 | <b>Agneta Burström</b>       | <b>Research nurse</b>                                                                  |
|                                 | <b>Corrado Cilio</b>         | <b>Assoc. Prof. Cellular autoimmunity</b>                                              |
|                                 | <b>Magnus Cinthio</b>        | <b>Assist. Prof. Electrical Measurements, Lund Technical University</b>                |
|                                 | <b>Karl Dreja</b>            | <b>Nephrologist</b>                                                                    |
|                                 | <b>Pontus Dunér</b>          | <b>Postdoc Exp. Cardiovasc. Research</b>                                               |
|                                 | <b>Daniel Engelbertsen</b>   | <b>PhD student Exp. Cardiovasc. Research</b>                                           |
|                                 | <b>Joao Fadista</b>          | <b>Postdoc</b>                                                                         |
|                                 | <b>Maria Gomez</b>           | <b>Assoc. Prof. Cardiovascular disease, WP4 co-leader</b>                              |
|                                 | <b>Isabel Goncalves</b>      | <b>Assis. Prof. Cardiovascular research</b>                                            |
|                                 | <b>Bo Hedblad</b>            | <b>Prof. Cardiovascular epidemiology</b>                                               |
|                                 | <b>Anna Hultgårdh</b>        | <b>Prof. Vessel Wall Biology</b>                                                       |
|                                 | <b>Martin E. Johansson</b>   | <b>Pathologist</b>                                                                     |
|                                 | <b>Cecilia Kennbäck</b>      | <b>Laboratory Engineer</b>                                                             |
|                                 | <b>Jasmina Kravic</b>        | <b>Database manager</b>                                                                |
|                                 | <b>Claes Ladenvall</b>       | <b>Genetic statistician</b>                                                            |
|                                 | <b>Åke Lernmark</b>          | <b>Prof. Type 1 diabetes and celiac disease</b>                                        |
|                                 | <b>Eero Lindholm</b>         | <b>Physician, Researcher Diabetic Complications</b>                                    |

|                               |                            |                                                                 |
|-------------------------------|----------------------------|-----------------------------------------------------------------|
|                               | Charlotte Ling             | Assist. Prof. Epigenetics                                       |
|                               | Holger Luthman             | Prof. Medical genetics                                          |
|                               | Olle Melander              | Assoc. Prof. Hypertension and cardiovascular disease            |
|                               | Malin Neptin               | Biomedical analyst                                              |
|                               | Jan Nilsson                | Prof. Experimental Cardiovascular research, WP3 leader          |
|                               | Peter Nilsson              | Prof. Internal medicine                                         |
|                               | Tobias Nilsson             | PhD student Electrical Measurements, Lund Technical University  |
|                               | Gunilla Nordin Fredriksson | Prof. Cardiovascular research                                   |
|                               | Marju Orho-Melander        | Prof. Genetic epidemiology                                      |
|                               | Emilia Ottoson-Laakso      | PhD student                                                     |
|                               | Annie Persson              | Research nurse                                                  |
|                               | Margaretha Persson         | Laboratory Engineer                                             |
|                               | Mats-Åke Persson           | Database manager                                                |
|                               | Jacqueline Postma          | Project manager                                                 |
|                               | Elisabeth Pranter          | Research nurse                                                  |
|                               | Sara Rattik                | PhD student Exp. Cardiovasc. Research                           |
|                               | Gunnar Sterner             | Chief physician Internal Medicine Research Unit                 |
|                               | Lilian Tindberg            | Research nurse                                                  |
|                               | Maria Wigren               | Postdoc Exp. Cardiovasc. Research                               |
|                               | Anna Zetterqvist           | PhD student                                                     |
|                               | Mikael Åkerlund            | Postdoc                                                         |
|                               | Gerd Östling               | Laboratory Engineer                                             |
|                               |                            |                                                                 |
| <b>3</b>                      | Timo Kanninen              | Technical director; PI                                          |
| <b>Biocomputing Platforms</b> | Anni Ahonen-Bishopp        | Software development manager                                    |
| <b>(BC Platforms)</b>         | Anita Eliasson             | Financial and administrative director                           |
| <b>Espoo, Finland</b>         | Timo Herrala               | System (server) specialist                                      |
|                               | Päivi Tikka-Kleemola       | Service manager                                                 |
|                               |                            |                                                                 |
| <b>4</b>                      | Anders Hamsten             | Prof. Cardiovascular disease; Atherosclerosis Research Unit; PI |
| <b>Karolinska Institute</b>   | Christer Betsholtz         | Prof. Vascular biology                                          |
| <b>Stockholm, Sweden</b>      | Ami Björkholm              | Administrator                                                   |
|                               | Ulf de Faire               | Professor emeritus Cardiovascular epidemiology                  |
|                               | Fariba Foroogh             | Research engineer                                               |
|                               | Guillem Genové             | Scientist                                                       |
|                               | Karl Gertow                | Research Assist. Prof. Cardiovascular genetics                  |
|                               | Bruna Gigante              | Assoc. Professor Cardiovascular epidemiology                    |
|                               | Bing He                    | Postdoc                                                         |
|                               | Karin Leander              | Assoc. Professor Cardiovascular epidemiology                    |
|                               | Olga McLeod                | Postdoc                                                         |

|                                  |                                          |                                                                                     |
|----------------------------------|------------------------------------------|-------------------------------------------------------------------------------------|
|                                  | <b>Maria Nastase-Mannila</b>             | <b>Postdoc</b>                                                                      |
|                                  | <b>Jaako Patrakka</b>                    | <b>Postdoc</b>                                                                      |
|                                  | <b>Angela Silveira</b>                   | <b>Assoc. Prof. Cardiovascular genetics</b>                                         |
|                                  | <b>Rona Strawbridge</b>                  | <b>Postdoc</b>                                                                      |
|                                  | <b>Karl Tryggvason</b>                   | <b>Prof. Medical Chemistry</b>                                                      |
|                                  | <b>Max Vikström</b>                      | <b>Statistician</b>                                                                 |
|                                  | <b>John Öhrvik</b>                       | <b>Professor</b>                                                                    |
|                                  | <b>Anne-May Österholm</b>                | <b>Postdoc</b>                                                                      |
|                                  |                                          |                                                                                     |
| <b>5</b>                         | <b>Barbara Thorand</b>                   | <b>Nutritional scientist, epidemiologist</b>                                        |
| <b>Helmholtz Centre</b>          | <b>Christian Gieger</b>                  | <b>Statistician</b>                                                                 |
| <b>Munich, Germany</b>           | <b>Harald Grallert</b>                   | <b>Biologist</b>                                                                    |
|                                  | <b>Tonia Ludwig</b>                      | <b>Statistician</b>                                                                 |
|                                  | <b>Barbara Nitz</b>                      | <b>Scientist</b>                                                                    |
|                                  | <b>Andrea Schneider</b>                  | <b>Data manager</b>                                                                 |
|                                  | <b>Rui Wang-Sattler</b>                  | <b>Scientist</b>                                                                    |
|                                  | <b>Astrid Zierer</b>                     | <b>Statistician</b>                                                                 |
|                                  |                                          |                                                                                     |
| <b>6</b>                         | <b>Giuseppe Remuzzi</b>                  | <b>Institute director; PI</b>                                                       |
| <b>Mario Negri Institute for</b> | <b>Ariela Benigni</b>                    | <b>Head of department Molecular Medicine</b>                                        |
| <b>Pharmacological Research</b>  | <b>Roberta Donadelli</b>                 | <b>Scientist</b>                                                                    |
|                                  | <b>Maria Domenica Lesti</b>              | <b>Researcher</b>                                                                   |
| <b>Bergamo, Italy</b>            | <b>Marina Noris</b>                      | <b>Head Laboratory Immunology and genetics of transplantation and rare diseases</b> |
|                                  | <b>Norberto Perico</b>                   | <b>Senior scientist</b>                                                             |
|                                  | <b>Annalisa Perna</b>                    | <b>Biostatistician</b>                                                              |
|                                  | <b>Rossella Piras</b>                    | <b>Postdoc</b>                                                                      |
|                                  | <b>Piero Ruggenenti</b>                  | <b>Head of department Renal medicine, Assist. Prof. Nephrology and dialysis</b>     |
|                                  | <b>Erica Rurali</b>                      | <b>Postdoc</b>                                                                      |
|                                  |                                          |                                                                                     |
| <b>7</b>                         | <b>David Dunger (att: Jane Horsford)</b> | <b>Prof. Paediatrics; PI</b>                                                        |
| <b>University of Cambridge</b>   | <b>Ludo Chassin</b>                      | <b>Senior Data Manager</b>                                                          |
| <b>UK</b>                        | <b>Neil Dalton, London</b>               | <b>Clinical biochemistry</b>                                                        |
|                                  | <b>John Deanfield, London</b>            | <b>Paediatric cardiology</b>                                                        |
|                                  | <b>Jane Horsford</b>                     | <b>PA to Prof. Dunger</b>                                                           |
|                                  | <b>Clare Rice</b>                        | <b>Operations manager/financial contact</b>                                         |
|                                  | <b>James Rudd</b>                        | <b>Cardiovascular imaging</b>                                                       |
|                                  | <b>Neil Walker</b>                       | <b>Head Data services</b>                                                           |
|                                  | <b>Karen Whitehead</b>                   | <b>Technician</b>                                                                   |

|                                                     |                    |                                                                                        |
|-----------------------------------------------------|--------------------|----------------------------------------------------------------------------------------|
|                                                     | Max Wong           | Postdoc                                                                                |
|                                                     |                    |                                                                                        |
| 8                                                   | Helen Colhoun      | Prof. Public health and epidemiology; PI; Vice coordinator Managing entity; WP2 leader |
|                                                     | Fiona Adams        |                                                                                        |
| University of Dundee                                | Tahira Akbar       | PA to Helen Colhoun                                                                    |
| Scotland                                            | Jill Belch         | Prof. Vasucular disease                                                                |
|                                                     | Harshal Deshmukh   | PhD student                                                                            |
|                                                     | Fiona Dove         |                                                                                        |
|                                                     | Angela Ellingford  | NHS Tayside Diabetic Retinopathy Screening Programme manager                           |
|                                                     | Bassam Farran      | Statistician                                                                           |
|                                                     | Mike Ferguson      | Dean of research Biological chemistry and drug discovery                               |
|                                                     | Gary Henderson     |                                                                                        |
|                                                     | Graeme Houston     | Consultant radiologist/senior lecturer                                                 |
|                                                     | Faisal Khan        | Reader, Vascular & Inflammatory Diseases Research Unit                                 |
|                                                     | Graham Leese       | Consultant diabetologist/reader                                                        |
|                                                     | Yiyuan Liu         | PhD student                                                                            |
|                                                     | Shona Livingstone  | Senior statistician                                                                    |
|                                                     | Helen Looker       | Epidemiologist                                                                         |
|                                                     | Margaret McCann    | Project assistant                                                                      |
|                                                     | Stuart McGurnaghan | Lead data programmer                                                                   |
|                                                     | David Newton       |                                                                                        |
|                                                     | Colin Palmer       | Prof. Pharmacogenomics                                                                 |
|                                                     | Ewan Pearson       | Consultant diabetologist/senior lecturer                                               |
|                                                     | Gillian Reekie     | Research Nurse                                                                         |
|                                                     | Natalie Smith      | Research Nurse                                                                         |
| University of Edinburgh and Health Data Research UK | Andrew D Morris    |                                                                                        |
| 9                                                   | Angela Shore       | Prof. Cardiovascular Science, PI                                                       |
| Peninsula Medical School                            | Kuni Aizawa        | Postdoc                                                                                |
| Exeter, UK                                          | Claire Ball        | Research nurse                                                                         |
|                                                     | Nick Bellenger     | Cardiologist                                                                           |
|                                                     | Francesco Casanova | Associate Research Fellow Vascular medicine                                            |
|                                                     | Tim Frayling       | Prof. Genetics                                                                         |
|                                                     | Phil Gates         | Senior lecturer Cardiovascular science                                                 |
|                                                     | Kim Gooding        | Postdoc Vascular medicine                                                              |
|                                                     | Andrew Hattersley  | Prof. Molecular medicine                                                               |
|                                                     | Roland Ling        | Consultant ophthalmologist                                                             |
|                                                     | David Mawson       | Research technician                                                                    |
|                                                     | Robin Shandas      | Prof. Bioengineering (Colorado)                                                        |

|                                                      |                            |                                                           |
|------------------------------------------------------|----------------------------|-----------------------------------------------------------|
|                                                      | <b>David Strain</b>        | <b>Stroke physician, clinical lecturer</b>                |
|                                                      | <b>Clare Thorn</b>         | <b>Postdoc Vascular medicine</b>                          |
|                                                      |                            |                                                           |
| <b>10</b>                                            | <b>Ulf Smith</b>           | <b>Prof. ; PI</b>                                         |
| <b>University of Gothenburg</b>                      | <b>Ann Hammarstedt</b>     | <b>Researcher Molecular and clinical medicine</b>         |
| <b>Sweden</b>                                        | <b>Hans Häring</b>         | <b>Prof. University of Tübingen</b>                       |
|                                                      | <b>Oluf Pedersen</b>       | <b>Prof. Steno Centre, Copenhagen</b>                     |
|                                                      | <b>Giorgio Sesti</b>       | <b>Prof. Universtiy of Magna Graecia of Catanzaro</b>     |
|                                                      |                            |                                                           |
| <b>11</b>                                            | <b>Per-Henrik Groop</b>    | <b>Prof. Diabetes genetics; PI</b>                        |
|                                                      | <b>Emma Fagerholm</b>      | <b>MSc; PhD student, genetics</b>                         |
| <b>Folkhälsan</b>                                    | <b>Carol Forsblom</b>      | <b>Clinical coordinator</b>                               |
| <b>Helsinki, Finland</b>                             | <b>Valma Harjutsalo</b>    | <b>PhD; FinnDiane Co-PI</b>                               |
|                                                      | <b>Maikki Parkkonen</b>    | <b>Laboratory manager</b>                                 |
|                                                      | <b>Niina Sandholm</b>      | <b>DSc(PhD); GWAS and bioinformatics, FinnDiane Co-PI</b> |
|                                                      | <b>Nina Tolonen</b>        | <b>MD PhD</b>                                             |
|                                                      | <b>Iiro Toppila</b>        | <b>BSc, MSc; bioinformatician</b>                         |
|                                                      | <b>Erkka Valo</b>          | <b>MSc; PhD student, bioinformatician</b>                 |
|                                                      |                            |                                                           |
| <b>12</b>                                            | <b>Veikko Salomaa</b>      | <b>Prof. Epidemiology; PI; deputy leader WP2</b>          |
| <b>The National Institute for Health and Welfare</b> | <b>Aki Havulinna</b>       | <b>DSc. (tech), statistician</b>                          |
| <b>Helsinki, Finland</b>                             | <b>Kati Kristiansson</b>   | <b>PhD</b>                                                |
|                                                      | <b>Pia Okamo</b>           | <b>THL press officer</b>                                  |
|                                                      | <b>Tomi Peltola</b>        | <b>PhD</b>                                                |
|                                                      | <b>Markus Perola</b>       | <b>Professor</b>                                          |
|                                                      | <b>Arto Pietilä</b>        | <b>Statistician</b>                                       |
|                                                      | <b>Samuli Ripatti</b>      | <b>Professor, Statistics</b>                              |
|                                                      | <b>Marketta Taimi</b>      | <b>Research assistant</b>                                 |
|                                                      |                            |                                                           |
| <b>13</b>                                            | <b>Seppo Ylä-Herttuala</b> | <b>Prof.; PI; WP4 leader</b>                              |
| <b>University of Eastern Finland</b>                 | <b>Mohan Babu</b>          | <b>PhD student</b>                                        |
| <b>Kuopio, Finland</b>                               | <b>Marike Dijkstra</b>     | <b>PhD student</b>                                        |
|                                                      | <b>Erika Gurzeler</b>      | <b>PhD student</b>                                        |
|                                                      | <b>Jenni Huusko</b>        | <b>PhD student</b>                                        |
|                                                      | <b>Ivana Kholová</b>       | <b>Postdoc</b>                                            |
|                                                      | <b>Markku Laakso</b>       | <b>Prof.</b>                                              |
|                                                      | <b>Mari Merentie</b>       | <b>PhD student</b>                                        |
|                                                      | <b>Marja Poikolainen</b>   | <b>PA Prof Ylä-Herttuala</b>                              |
|                                                      |                            |                                                           |

|                             |                            |                                                                                                                                                               |
|-----------------------------|----------------------------|---------------------------------------------------------------------------------------------------------------------------------------------------------------|
| <b>14</b>                   | <b>Mark McCarthy</b>       | <b>Prof. Human type 2 diabetes; Oxford Centre for Diabetes, Endocrinology and Metabolism; Wellcome Trust Centre for Human Genetics; PI; deputy leader WP1</b> |
| <b>University of Oxford</b> | <b>Will Rayner</b>         | <b>Database manager</b>                                                                                                                                       |
| <b>UK</b>                   | <b>Neil Robertson</b>      | <b>Informatics</b>                                                                                                                                            |
|                             | <b>Natalie van Zuydam</b>  | <b>Postdoc</b>                                                                                                                                                |
|                             |                            |                                                                                                                                                               |
|                             |                            |                                                                                                                                                               |
|                             |                            |                                                                                                                                                               |
|                             |                            |                                                                                                                                                               |
|                             |                            |                                                                                                                                                               |
| <b>15</b>                   | <b>Claudio Cobelli</b>     | <b>Prof. ; PI; WP5 leader</b>                                                                                                                                 |
| <b>University of Padova</b> | <b>Barbara Di Camillo</b>  | <b>Assist. Prof.</b>                                                                                                                                          |
| <b>Italy</b>                | <b>Francesca Finotello</b> | <b>PhD student</b>                                                                                                                                            |
|                             | <b>Francesco Sambo</b>     | <b>Postdoctoral fellow</b>                                                                                                                                    |
|                             | <b>Gianna Toffolo</b>      | <b>Prof.</b>                                                                                                                                                  |
|                             | <b>Emanuele Trifoglio</b>  | <b>PhD student</b>                                                                                                                                            |
|                             |                            |                                                                                                                                                               |
| <b>16</b>                   | <b>Riccardo Bellazzi</b>   | <b>Prof. Bioengineering; PI; deputy leader WP5</b>                                                                                                            |
|                             | <b>Nicola Barbarini</b>    | <b>Postdoctoral fellow</b>                                                                                                                                    |
| <b>University of Pavia</b>  | <b>Mauro Bucalo</b>        | <b>Software engineer</b>                                                                                                                                      |
| <b>Italy</b>                | <b>Christiana Larizza</b>  | <b>Assist. Prof.</b>                                                                                                                                          |
|                             | <b>Paolo Magni</b>         | <b>Assoc. Prof.</b>                                                                                                                                           |
|                             | <b>Alberto Malovini</b>    | <b>Postdoctoral fellow</b>                                                                                                                                    |
|                             | <b>Simone Marini</b>       | <b>Postdoctoral fellow</b>                                                                                                                                    |
|                             | <b>Francesca Mulas</b>     | <b>Postdoctoral fellow</b>                                                                                                                                    |
|                             | <b>Silvana Quaglini</b>    | <b>Prof.</b>                                                                                                                                                  |
|                             | <b>Lucia Sacchi</b>        | <b>Assist. Prof.</b>                                                                                                                                          |
|                             | <b>Francesca Vitali</b>    |                                                                                                                                                               |
|                             |                            |                                                                                                                                                               |
| <b>17</b>                   | <b>Ele Ferrannini</b>      | <b>Prof. Medicine; PI</b>                                                                                                                                     |
|                             | <b>Beatrice Boldrini</b>   | <b>Postdoctoral fellow</b>                                                                                                                                    |
| <b>University of Pisa</b>   | <b>Michaela Kozakova</b>   | <b>Senior investigator Medical Pathophysiology</b>                                                                                                            |
| <b>Italy</b>                | <b>Andrea Mari</b>         | <b>Senior researcher Biomedical engineering (ISIB-CNR, Padova)</b>                                                                                            |
|                             | <b>Carmela Morizzo</b>     | <b>Biologist, Sonographer Cardiovascular ultrasound</b>                                                                                                       |
|                             | <b>Lucrecia Mota</b>       | <b>EGIR administrative office</b>                                                                                                                             |
|                             | <b>Andrea Natali</b>       | <b>Assoc. Prof. Medicine</b>                                                                                                                                  |
|                             | <b>Carlo Palombo</b>       | <b>Assoc. Prof. Medicine; deputy leader WP3</b>                                                                                                               |
|                             | <b>Elena Venturi</b>       | <b>Researcher</b>                                                                                                                                             |
|                             | <b>Mark Walker</b>         | <b>Prof. Molecular diabetic medicine (Univ Newcastle-upon-Tyne )</b>                                                                                          |
|                             |                            |                                                                                                                                                               |



|                             |                               |                                                                                     |
|-----------------------------|-------------------------------|-------------------------------------------------------------------------------------|
| 18                          | Carlo Patrono                 | Prof. Pharmacology; PI                                                              |
| Catholic University of Rome | Francesca Pagliaccia          | PhD student                                                                         |
| Italy                       | Bianca Rocca                  | Assist. Prof. Pharmacology                                                          |
|                             |                               |                                                                                     |
| 19                          | Pirjo Nuutila                 | Prof. ; PI                                                                          |
| University of Turku         | Johanna Haukkala              | PhD student                                                                         |
| Finland                     | Juhani Knuuti                 | Prof. ; Director Turku PET Centre                                                   |
|                             | Anne Roivainen                | Prof.                                                                               |
|                             | Antti Saraste                 | Adj. Prof.                                                                          |
|                             |                               |                                                                                     |
| 20                          | Paul McKeague                 | Prof. Genetic Epidemiology; PI                                                      |
| University of Edinburgh     | Norma Brown                   | Research administrator, Public Health Services                                      |
| Scotland                    | Marco Colombo                 | Bioinformaticist                                                                    |
|                             |                               |                                                                                     |
| 21                          | Birgit Steckel-Hamann         | Deputy coordinator; PI, Manager IMI, LRL                                            |
| Eli Lilly                   | Krister Bokvist               | Biostatistician                                                                     |
|                             | Sudha Shankar                 | Diabetologist                                                                       |
|                             | Melissa Thomas                | Translational Science                                                               |
|                             |                               |                                                                                     |
| 22                          | Li-ming Gan                   | Prof.; Translational Science Director Cardiovascular Disease; PI, WP3 leader        |
| AstraZeneca                 | Suvi Heinonen                 | PhD, Internal AZ postdoc, Bioscience                                                |
|                             | Ann-Cathrine Jönsson-Rylander | PhD, Assoc. Prof., Team Leader Bioscience, WP4 leader                               |
|                             | Remi Momo                     | Postdoctoral fellow                                                                 |
|                             | Volker Schneck                | Informatician Translational Science, WP5 leader                                     |
|                             | Robert Unwin                  | Translational Science Director Diabetic Nephropathy                                 |
|                             | Anna Walentinsson             | Geneticist Translational Science                                                    |
|                             | Carl Whatling                 | Bioscientist                                                                        |
|                             |                               |                                                                                     |
| 23                          | Everson Nogoceke              | Pre-clinical and clinical aspects of metabolic and vascular disease; PI; WP2 leader |
| Roche                       | Gonzalo Durán Pacheco         | Senior Research Statistician                                                        |
|                             | Ivan Formentini               | Biomarker & Experimental Medicine Leader                                            |
|                             | Thomas Schindler              | Pre-clinical and clinical and clinical biomarkers                                   |
|                             |                               |                                                                                     |
| 24                          | Piero Tortoli                 | Professor of Electronics                                                            |
| University of Florence      | Luca Bassi                    | Postdoctoral fellow                                                                 |
|                             | Enrico Boni                   | Postdoctoral fellow                                                                 |
|                             | Alessandro Dallai             | Postdoctoral fellow                                                                 |
|                             | Francesco Guidi               | Technician                                                                          |

|                       |                             |                                                                          |
|-----------------------|-----------------------------|--------------------------------------------------------------------------|
|                       | <b>Matteo Lenge</b>         | <b>PhD student</b>                                                       |
|                       | <b>Riccardo Matera</b>      | <b>PhD student</b>                                                       |
|                       | <b>Alessandro Ramalli</b>   | <b>PhD student</b>                                                       |
|                       | <b>Stefano Ricci</b>        | <b>Assist. Prof.</b>                                                     |
|                       | <b>Jacopo Viti</b>          | <b>PhD student</b>                                                       |
|                       |                             | -                                                                        |
| <b>25</b>             | <b>Bernd Jablonka</b>       | <b>SAD internal IMI coordinator</b>                                      |
| <b>Sanofi-aventis</b> | <b>Dan Crowther</b>         | <b>Biomarker researcher</b>                                              |
|                       | <b>Johan Gassenhuber</b>    | <b>Biostatistician</b>                                                   |
|                       | <b>Sibylle Hess</b>         | <b>Biomarker researcher</b>                                              |
|                       | <b>Thomas Hübschle</b>      | <b>Pharmacologist Diabetes</b>                                           |
|                       | <b>Hans-Paul Juretschke</b> | <b>Imaging</b>                                                           |
|                       | <b>Hartmut Rütten</b>       | <b>Head Translational Medicine</b>                                       |
|                       | <b>Thorsten Sadowski</b>    | <b>Pharmacologist Diabetes</b>                                           |
|                       | <b>Paulus Wohlfart</b>      | <b>Pharmacologist Diabetes</b>                                           |
|                       |                             | -                                                                        |
| <b>26</b>             | <b>Julia Brosnan</b>        | <b>Biochemist, (pre)clinical research CVD, Pfizer US;<br/>WP2 leader</b> |
| <b>Pfizer</b>         | <b>Valerie Clerin</b>       | <b>Cardio-renal biologist, WP2</b>                                       |
|                       | <b>Eric Fauman</b>          | <b>Computational biologist</b>                                           |
|                       | <b>Craig Hyde</b>           | <b>Statistician</b>                                                      |
|                       | <b>Anders Malarstig</b>     | <b>Human genetics, Pfizer Europé; WP1 leader</b>                         |
|                       | <b>Nick Pullen</b>          | <b>Renal Disease Research Director</b>                                   |
|                       | <b>Mera Tilley</b>          |                                                                          |
|                       | <b>Theresa Tuthill</b>      | <b>Imaging specialist</b>                                                |
|                       | <b>Ciara Vangjeli</b>       | <b>Cardiovascular genetic epidemiologist, Pfizer Europe</b>              |
|                       | <b>Daniel Ziemek</b>        | <b>Computational biologist</b>                                           |

## References

1. Webb TR, Erdmann J, Stirrups KE, Stitzel NO, Masca NGD, Jansen H, Kanoni S, Nelson CP, Ferrario PG, König IR, et al. Systematic Evaluation of Pleiotropy Identifies 6 Further Loci Associated With Coronary Artery Disease. *J Am Coll Cardiol*. 2017;69:823–836.
2. Voight BF, Kang HM, Ding J, Palmer CD, Sidore C, Chines PS, Burt NP, Fuchsberger C, Li Y, Erdmann J, et al. The Metabochip, a Custom Genotyping Array for Genetic Studies of Metabolic, Cardiovascular, and Anthropometric Traits. *PLoS Genet*. 2012;8:e1002793.
3. Mägi R, Morris AP. GWAMA: software for genome-wide association meta-analysis. *BMC Bioinformatics*. 2010;11:288.
4. R Core Team. R: A Language and Environment for Statistical Computing 2013. R Foundation for Statistical Computing. 2019. Vienna, Austria.
5. Zheng J, Erzurumluoglu AM, Elsworth BL, Kemp JP, Howe L, Haycock PC, Hemani G, Tansey K, Laurin C, Pourcain BS, et al. LD Hub: A centralized database and web interface to perform LD score regression that maximizes the potential of summary level GWAS data for SNP heritability and genetic correlation analysis. *Bioinformatics*. 2017;33:272–279.
6. Shungin D, Winkler TW, Croteau-Chonka DC, Ferreira T, Locke AE, Mägi R, Strawbridge RJ, Pers TH, Fischer K, Justice AE, et al. New genetic loci link adipose and insulin biology to body fat distribution. *Nature* 2015;518:187–196.
7. Locke AE, Kahali B, Berndt SI, Justice AE, Pers TH, Day FR, Powell C, Vedantam S, Buchkovich ML, Yang J, et al. Genetic studies of body mass index yield new insights for obesity biology. *Nature*. 2015;518:197–206.
8. Thorleifsson G, Walters GB, Gudbjartsson DF, Steinthorsdottir V, Sulem P, Helgadóttir A, Styrkarsdóttir U, Gretarsdóttir S, Thorlacius S, Jonsdóttir I, et al. Genome-wide association yields new sequence variants at seven loci that associate with measures of obesity. *Nat Genet*. 2009;41:18–24.
9. Newton-Cheh C, Johnson T, Gateva V, Tobin MD, Bochud M, Coin L, Najjar SS, Zhao JH, Heath SC, Eyheramendy S, et al. Genome-wide association study identifies eight loci associated with blood pressure. *Nat Genet*. 2009;41:666–676.
10. Ehret GB, Munroe PB, Rice KM, Bochud M, Johnson AD, Chasman DI, Smith AV, Tobin MD, Verwoert GC, Hwang SJ, et al. Genetic variants in novel pathways influence blood pressure and cardiovascular disease risk. *Nature*. 2011;478:103–109.
11. Willer CJ, Sanna S, Jackson AU, Scuteri A, Bonnycastle LL, Clarke R, Heath SC, Timpson NJ, Najjar SS, Stringham HM, et al. Newly identified loci that influence lipid concentrations and risk of coronary artery disease. *Nat Genet*. 2008;40:161–169.

12. Mahajan A, Taliun D, Thurner M, Robertson NR, Torres JM, Rayner NW, Payne AJ, Steinthorsdottir V, Scott RA, Grarup N, et al. Fine-mapping type 2 diabetes loci to single-variant resolution using high-density imputation and islet-specific epigenome maps. *Nat Genet.* 2018;50:1505–1513.
13. Saxena R, Hivert M-F, Langenberg C, Tanaka T, Pankow JS, Vollenweider P, Lyssenko V, Bouatia-Naji N, Dupuis J, Jackson AU, et al. Genetic variation in *GIPR* influences the glucose and insulin responses to an oral glucose challenge. *Nat Genet.* 2010;42:142–148.
14. Manning AK, Hivert M-F, Scott RA, Grimsby JL, Bouatia-Naji N, Chen H, Rybin D, Liu CT, Bielak LF, Prokopenko I, et al. A genome-wide approach accounting for body mass index identifies genetic variants influencing fasting glycemic traits and insulin resistance. *Nat Genet.* 2012;44:659–669.
15. Soranzo N, Sanna S, Wheeler E, Gieger C, Radke D, Dupuis J, Bouatia-Naji N, Langenberg C, Prokopenko I, Stolerman E, et al. Common variants at 10 genomic loci influence hemoglobin A1C levels via glycemic and nonglycemic pathways. *Diabetes.* 2010;59:3229–3239.
16. Strawbridge RJ, Dupuis J, Prokopenko I, Barker A, Ahlqvist E, Rybin D, Petrie JR, Travers ME, Bouatia-Naji N, Dimas A S, et al. Genome-Wide Association Identifies Nine Common Variants Associated With Fasting Proinsulin Levels and Provides New Insights Into the Pathophysiology of Type 2 Diabetes. *Diabetes.* 2011;60:2624–2634.
17. Dupuis J, Langenberg C, Prokopenko I, Saxena R, Soranzo N, Jackson AU, Wheeler E, Glazer NL, Bouatia-Naji N, Gloyn AL, et al. New genetic loci implicated in fasting glucose homeostasis and their impact on type 2 diabetes risk. *Nat Genet.* 2010;42:105–116.
18. Lotta LA, Gulati P, Day FR, Payne F, Ongen H, van de Bunt M, Gaulton KJ, Eicher JD, Sharp SJ, Luan J, et al. Integrative genomic analysis implicates limited peripheral adipose storage capacity in the pathogenesis of human insulin resistance. *Nat Genet.* 2017;49:17–26.
19. Burgess S. R: A Language and Environment for Statistical Computing Package “MendelianRandomization” 2018.
20. Burgess S, Butterworth A, Thompson SG. Mendelian Randomization analysis with multiple genetic variants using summarized data. *Genet Epidemiol.* 2013;37:658–665.
